# Supplementary material
Source: PubMed Central journal article supplement (PMC3591662)
Supplement: supp_M112.017400_mcp.M112.017400-3.pdf [file supp_M112.017400_mcp.M112.017400-3.pdf]

|     | OD charge | ETD charge | Accession  | Accession (alternative) | Protein name                                                            | m/z (obs.) | z  | M (calc) (Da) | Mass error (Da) | Score | Expectation | N-term | Sequence                                                                            | C-term | Modification    |
|-----|-----------|------------|------------|-------------------------|-------------------------------------------------------------------------|------------|----|---------------|-----------------|-------|-------------|--------|-------------------------------------------------------------------------------------|--------|-----------------|
| ETD |           |            | gE04523    |                         | 10 kDa heat shock protein, mitochondrial                                | 774.966    | 14 | 10835.813     | -0.097          | 146   | 5.30E-11    | M      | AGGARFKFLPDRVYVERAAETVYKGMPEKGGKVVQATVYVSSGRKGGQVGGYVQDKLPEYDQTKYVLDKDFYFRDGLQKLVYD | -      | Acetyl (N-term) |
| ETD |           |            | gE131692   |                         | 40S ribosomal protein S30                                               | 604.9004   | 11 | 6643.8166     | -0.023          | 107   | 5.00E-08    | -      | KYKGLARAGVRSQVTKVAKGKKKKTKRARRKRRVYRVPVTFKDKKQPNANS                                 | -      |                 |
| CD  |           |            | gE1585794  |                         | Neuroendocrine protein 782                                              | 658.2757   | 2  | 1314.5364     | 0.004           | 58    | 0.004       | Y      | RPFSEEDKDFE                                                                         | -      |                 |
| ETD |           |            | gE1585794  |                         | Neuroendocrine protein 782                                              | 472.2088   | 3  | 1413.6048     | -0.002          | 55    | 0.017       | S      | VYHFEEDKDFE                                                                         | -      |                 |
| ETD | 2.3       | 3          | gE1585794  |                         | Neuroendocrine protein 782                                              | 501.2194   | 3  | 1500.6369     | -0.005          | 74    | 0.00017     | K      | SYHFEEDKDFE                                                                         | -      |                 |
| CD  |           |            | gE1585794  |                         | Neuroendocrine protein 782                                              | 751.3262   | 2  | 1500.6369     | 0.011           | 66    | 0.0012      | K      | SYHFEEDKDFE                                                                         | -      |                 |
| ETD |           | 4.5        | gE1585794  |                         | Neuroendocrine protein 782                                              | 703.1649   | 5  | 3510.7379     | 0.004           | 124   | 1.00E-08    | R      | SYNPLGGRLQNLVYAKKSYVHFEEDKDFE                                                       | -      |                 |
| CD  |           |            | gE1585794  |                         | Neuroendocrine protein 782                                              | 789.9193   | 2  | 1585.8212     | 0.028           | 79    | 0.00018     | Y      | NPLVGGRLQNLVY                                                                       | -      | K               |
| CD  |           |            | gE1585794  |                         | Neuroendocrine protein 782                                              | 886.9703   | 2  | 1771.9217     | 0.044           | 54    | 0.059       | R      | SYNPLGGRLQNLVY                                                                      | -      | K               |
| CD  |           |            | gE1585794  |                         | Neuroendocrine protein 782                                              | 726.1410   | 4  | 2900.5290     | 0.058           | 108   | 3.00E-07    | R      | TPQVYVADGKLLHVMGEGDARPP                                                             | -      | R               |
| CD  |           | 4.5        | gE1585794  |                         | Neuroendocrine protein 782                                              | 612.3338   | 5  | 3056.5201     | 0.025           | 131   | 1.10E-09    | R      | TPQVYVADGKLLHVMGEGDARPP                                                             | -      | V               |
| ETD |           | 4.5        | gE1585794  |                         | Neuroendocrine protein 782                                              | 761.1850   | 4  | 3056.5201     | 0.041           | 59    | 0.0001      | R      | TPQVYVADGKLLHVMGEGDARPP                                                             | -      | V               |
| ETD |           | 5.6        | gE1585794  |                         | Neuroendocrine protein 782                                              | 164.3204   | 6  | 3559.8794     | -0.007          | 137   | 4.00E-14    | A      | YPRVYVYVADGKLLHVMGEGDARPP                                                           | -      | V               |
| CD  |           | 5.6        | gE1585794  |                         | Neuroendocrine protein 782                                              | 712.9448   | 5  | 3559.8794     | 0.083           | 132   | 1.00E-08    | A      | YPRVYVYVADGKLLHVMGEGDARPP                                                           | -      | V               |
| CD  |           | 4          | gE15496847 |                         | Dialinargin and metalloproteinase domain-containing protein 10 (ADAM10) | 571.2920   | 4  | 2281.0988     | 0.000           | 60    | 0.00018     | R      | HYEGLYVYVGLHVKHQRKA                                                                 | -      | K               |
| ETD |           | 4          | gE15496847 |                         | Dialinargin and metalloproteinase domain-containing protein 10 (ADAM10) | 571.2921   | 4  | 2281.0988     | 0.007           | 112   | 1.10E-07    | R      | HYEGLYVYVGLHVKHQRKA                                                                 | -      | K               |
| ETD |           | 4          | gE15496847 |                         | Dialinargin and metalloproteinase domain-containing protein 10 (ADAM10) | 616.1459   | 6  | 3684.8298     | 0.021           | 122   | 1.80E-08    | G      | GOYVPLNKRHYHTEGLYVYVGLHVKHQRKA                                                      | -      | K               |
| CD  |           | 5          | gE15496847 |                         | Dialinargin and metalloproteinase domain-containing protein 10 (ADAM10) | 507.4499   | 5  | 2532.2159     | -0.030          | 66    | 0.0048      | R      | AYSHDEGFLRDFPHARRRFR                                                                | -      | L               |
| ETD |           | 5          | gE15496847 |                         | Dialinargin and metalloproteinase domain-containing protein 10 (ADAM10) | 507.4502   | 5  | 2532.2159     | -0.016          | 80    | 0.0002      | R      | AYSHDEGFLRDFPHARRRFR                                                                | -      | L               |
| CD  |           | 5          | gE15496847 |                         | Dialinargin and metalloproteinase domain-containing protein 10 (ADAM10) | 890.7510   | 3  | 2689.2279     | 0.034           | 79    | 0.00018     | K      | YQMTVVEEYVTPGEEHAAHPDEL                                                             | -      | L               |
| ETD |           | 3          | gE15496847 |                         | Dialinargin and metalloproteinase domain-containing protein 10 (ADAM10) | 514.4974   | 4  | 2053.9606     | -0.001          | 123   | 6.10E-09    | R      | HYEGLYVYVGLHVKHQK                                                                   | -      | R               |
| CD  |           | 3          | gE15496847 |                         | Dialinargin and metalloproteinase domain-containing protein 10 (ADAM10) | 685.6810   | 3  | 2053.9606     | 0.006           | 63    | 0.0004      | R      | HYEGLYVYVGLHVKHQK                                                                   | -      | R               |
| CD  |           | 5          | gE1498647  |                         | Dialinargin and metalloproteinase domain-containing protein 10 (ADAM10) | 928.4454   | 3  | 2782.3120     | 0.023           | 83    | 9.60E-05    | K      | YQMTVVEEYVTPGEEHAAHPDEL                                                             | -      | R               |
| ETD |           | 5          | gE1498647  |                         | Dialinargin and metalloproteinase domain-containing protein 10 (ADAM10) | 677.7367   | 5  | 3383.6435     | 0.036           | 112   | 1.40E-07    | G      | GYVPLNKRHYHTEGLYVYVGLHVKHQK                                                         | -      | R               |
| CD  |           | 5          | gE1498647  |                         | Dialinargin and metalloproteinase domain-containing protein 10 (ADAM10) | 677.7368   | 5  | 3383.6435     | 0.041           | 70    | 0.0024      | G      | GYVPLNKRHYHTEGLYVYVGLHVKHQK                                                         | -      | R               |
| ETD |           | 5          | gE1498647  |                         | Dialinargin and metalloproteinase domain-containing protein 10 (ADAM10) | 692.5463   | 5  | 3457.6915     | 0.034           | 150   | 2.70E-11    | G      | GOYVPLNKRHYHTEGLYVYVGLHVKHQK                                                        | -      | R               |
| CD  |           | 5          | gE1498647  |                         | Dialinargin and metalloproteinase domain-containing protein 10 (ADAM10) | 692.5464   | 5  | 3457.6915     | 0.041           | 100   | 2.60E-08    | G      | GOYVPLNKRHYHTEGLYVYVGLHVKHQK                                                        | -      | R               |
| ETD |           | 2.3        | gE292161   |                         | Transforming growth factor-beta-induced protein ig-h3 (TGFB3)           | 487.6144   | 3  | 1459.8221     | -0.006          | 62    | 0.0054      | R      | LAPFYQKLEIRM                                                                        | -      | K               |
| CD  |           | 2.3        | gE292161   |                         | Transforming growth factor-beta-induced protein ig-h3 (TGFB3)           | 709.9198   | 2  | 1459.8221     | 0.000           | 71    | 0.00062     | R      | LAPFYQKLEIRM                                                                        | -      | K               |
| ETD |           | 3          | gE292161   |                         | Transforming growth factor-beta-induced protein ig-h3 (TGFB3)           | 771.7185   | 3  | 2312.1284     | 0.002           | 73    | 0.00085     | R      | GGELASALEPFGASAFSRAS                                                                | -      | D               |
| CD  |           | 3          | gE292161   |                         | Transforming growth factor-beta-induced protein ig-h3 (TGFB3)           | 771.7191   | 3  | 2312.1284     | 0.001           | 73    | 0.0009      | R      | GGELASALEPFGASAFSRAS                                                                | -      | D               |
| CD  |           | 2.3        | gE292161   |                         | Transforming growth factor-beta-induced protein ig-h3 (TGFB3)           | 587.9478   | 2  | 1122.8805     | 0.005           | 50    | 0.001       | R      | LAPFYQKLE                                                                           | -      | R               |
| ETD |           | 2.3        | gE292161   |                         | Transforming growth factor-beta-induced protein ig-h3 (TGFB3)           | 466.9490   | 3  | 1397.9582     | 0.047           | 114   | 6.40E-08    | R      | GGELASALEPFGASAFS                                                                   | -      | R               |
| CD  |           | 2.3        | gE292161   |                         | Transforming growth factor-beta-induced protein ig-h3 (TGFB3)           | 399.9990   | 2  | 1397.9582     | 0.053           | 76    | 0.00045     | R      | GGELASALEPFGASAFS                                                                   | -      | R               |
| ETD |           | 2.3        | gE292161   |                         | Transforming growth factor-beta-induced protein ig-h3 (TGFB3)           | 611.0545   | 4  | 2440.1870     | 0.020           | 144   | 3.90E-13    | R      | GGELASALEPFGASAFSRASD                                                               | -      | R               |
| CD  |           | 2.3        | gE292161   |                         | Transforming growth factor-beta-induced protein ig-h3 (TGFB3)           | 1221.1094  | 2  | 2440.1870     | 0.053           | 174   | 7.00E-14    | R      | GGELASALEPFGASAFSRASD                                                               | -      | R               |
| CD  |           | 5.6        | gE292161   |                         | Transforming growth factor-beta-induced protein ig-h3 (TGFB3)           | 637.9836   | 3  | 1910.9061     | 0.029           | 83    | 8.00E-05    | R      | GGELASALEPFGASAF                                                                    | -      | S               |
| CD  |           | 5.6        | gE7885478  |                         | calcitonin gene-related peptide 1 precursor                             | 1172.4003  | 5  | 5856.9479     | 0.072           | 208   | 6.80E-17    | A      | APRSLAESPADATLSEDEARLLLAALVQDYVQVMKASLEGEGERGSRRI                                   | -      | A               |
| ETD |           | 2          | gE7885478  |                         | calcitonin gene-related peptide 1 precursor                             | 641.0152   | 3  | 1920.0218     | 0.019           | 105   | 4.10E-07    | R      | RSQGVYKNNFVPTNVSQKAF                                                                | -      | G               |
| CD  |           | 2          | gE7885478  |                         | calcitonin gene-related peptide 1 precursor                             | 961.0197   | 2  | 1920.0218     | 0.003           | 87    | 2.70E-05    | R      | RSQGVYKNNFVPTNVSQKAF                                                                | -      | G               |
| ETD |           | 3          | gE7885478  |                         | calcitonin gene-related peptide 1 precursor                             | 693.0486   | 3  | 2076.1229     | 0.013           | 107   | 2.30E-07    | S      | RSQGVYKNNFVPTNVSQKAF                                                                | -      | G               |
| CD  |           | 3          | gE7885478  |                         | calcitonin gene-related peptide 1 precursor                             | 693.0488   | 3  | 2076.1229     | 0.017           | 58    | 0.018       | S      | RSQGVYKNNFVPTNVSQKAF                                                                | -      | G               |
| ETD |           | 3.4        | gE7885478  |                         | calcitonin gene-related peptide 1 precursor                             | 598.3381   | 4  | 2389.3230     | 0.004           | 162   | 5.40E-13    | G      | LLSRSDGVYKNNFVPTNVSQKAF                                                             | -      | G               |
| CD  |           | 3.4        | gE7885478  |                         | calcitonin gene-related peptide 1 precursor                             | 797.4499   | 3  | 2389.3230     | 0.050           | 119   | 1.10E-08    | G      | LLSRSDGVYKNNFVPTNVSQKAF                                                             | -      | G               |
| CD  |           | 3.4        | gE7885478  |                         | calcitonin gene-related peptide 1 precursor                             | 877.8305   | 3  | 2630.4857     | 0.039           | 98    | 1.20E-08    | R      | LASLLSRSDGVYKNNFVPTNVSQKAF                                                          | -      | G               |
| ETD |           | 3.4        | gE7885478  |                         | calcitonin gene-related peptide 1 precursor                             | 658.6247   | 4  | 2630.4857     | 0.041           | 162   | 4.30E-13    | R      | LASLLSRSDGVYKNNFVPTNVSQKAF                                                          | -      | G               |
| CD  |           | 3.4        | gE7885478  |                         | calcitonin gene-related peptide 1 precursor                             | 763.8831   | 2  | 1525.7485     | 0.002           | 62    | 0.0088      | E      | GEGERGSRRIAG                                                                        | -      | K               |
| CD  |           | 3.4        | gE7885478  |                         | calcitonin gene-related peptide 1 precursor                             | 595.9753   | 3  | 1784.9016     | 0.024           | 68    | 0.0022      | E      | LEGERGSRRIAG                                                                        | -      | K               |
| ETD |           | 3          | gE7885478  |                         | calcitonin gene-related peptide 1 precursor                             | 951.0343   | 4  | 2300.1083     | -0.004          | 129   | 2.40E-09    | M      | KASLEGEGERGSRRIAG                                                                   | -      | K               |
| CD  |           | 3.4        | gE7885478  |                         | calcitonin gene-related peptide 1 precursor                             | 724.7780   | 3  | 2300.1083     | 0.001           | 96    | 4.90E-08    | M      | KASLEGEGERGSRRIAG                                                                   | -      | K               |
| ETD |           | 2.4        | gE7885478  |                         | calcitonin gene-related peptide 1 precursor                             | 1837.944   | 4  | 2331.1488     | -0.002          | 189   | 8.00E-13    | G      | MKASLEGEGERGSRRIAG                                                                  | -      | G               |
| CD  |           | 2.4        | gE7885478  |                         | calcitonin gene-related peptide 1 precursor                             | 1837.948   | 4  | 2331.1488     | 0.014           | 78    | 0.0002      | G      | MKASLEGEGERGSRRIAG                                                                  | -      | K               |
| ETD |           | 3.4        | gE7885478  |                         | calcitonin gene-related peptide 1 precursor                             | 4405.753   | 4  | 2558.2758     | -0.036          | 93    | 9.70E-06    | Y      | VQMKASLEGEGERGSRRIAG                                                                | -      | K               |
| ETD |           | 3.4        | gE7885478  |                         | calcitonin gene-related peptide 1 precursor                             | 4405.761   | 4  | 2558.2758     | -0.005          | 171   | 1.60E-13    | Y      | VQMKASLEGEGERGSRRIAG                                                                | -      | K               |
| ETD |           | 3.4        | gE7885478  |                         | calcitonin gene-related peptide 1 precursor                             | 681.429    | 4  | 2721.3391     | 0.006           | 160   | 2.40E-12    | D      | VYQMKASLEGEGERGSRRIAG                                                               | -      | K               |
| CD  |           | 3.4        | gE7885478  |                         | calcitonin gene-related peptide 1 precursor                             | 681.3430   | 4  | 2721.3391     | 0.038           | 133   | 1.10E-09    | D      | VYQMKASLEGEGERGSRRIAG                                                               | -      | K               |
| CD  |           | 4.5        | gE7885478  |                         | calcitonin gene-related peptide 1 precursor                             | 1220.3095  | 3  | 3657.9035     | 0.003           | 57    | 0.049       | R      | LLLAALVQDYVQVMKASLEGEGERGSRRIAG                                                     | -      | K               |
| CD  |           | 4.5        | gE7885478  |                         | calcitonin gene-related peptide 1 precursor                             | 346.4914   | 5  | 4727.6075     | 0.019           | 225   | 9.90E-19    | D      | PATLSEDEARLLLAALVQDYVQVMKASLEGEGERGSRRIAG                                           | -      | K               |
| ETD |           | 4.5        | gE7885478  |                         | calcitonin gene-related peptide 1 precursor                             | 346.4948   | 5  | 4727.6075     | 0.001           | 163   | 2.00E-12    | D      | PATLSEDEARLLLAALVQDYVQVMKASLEGEGERGSRRIAG                                           | -      | K               |
| CD  |           | 5.6        | gE7885478  |                         | calcitonin gene-related peptide 1 precursor                             | 1297.1590  | 4  | 5184.5884     | 0.085           | 198   | 6.10E-16    | E      | SPADPATLSEDEARLLLAALVQDYVQVMKASLEGEGERGSRRIAG                                       | -      | K               |
| CD  |           | 5.6        | gE7885478  |                         | calcitonin gene-related peptide 1 precursor                             | 1063.7351  | 5  | 5113.6310     | 0.081           | 106   | 8.00E-07    | L      | ESPADPATLSEDEARLLLAALVQDYVQVMKASLEGEGERGSRRIAG                                      | -      | K               |
| CD  |           | 5.6        | gE7885478  |                         | calcitonin gene-related peptide 1 precursor                             | 1086.3543  | 5  | 5426.7150     | 0.021           | 221   | 1.10E-18    | A      | LESSPADPATLSEDEARLLLAALVQDYVQVMKASLEGEGERGSRRIAG                                    | -      | K               |
| CD  |           | 5.6        | gE7885478  |                         | calcitonin gene-related peptide 1 precursor                             | 931.8078   | 6  | 5684.7842     | 0.088           | 128   | 6.30E-09    | R      | SALESSPADPATLSEDEARLLLAALVQDYVQVMKASLEGEGERGSRRIAG                                  | -      | K               |
| ETD |           | 5.6        | gE7885478  |                         | calcitonin gene-related peptide 1 precursor                             | 1117.9888  | 5  | 5684.7842     | 0.024           | 121   | 3.10E-08    | R      | SALESSPADPATLSEDEARLLLAALVQDYVQVMKASLEGEGERGSRRIAG                                  | -      | K               |
| CD  |           | 5.6        | gE7885478  |                         | calcitonin gene-related peptide 1 precursor                             | 1149.1876  | 5  | 5740.8853     | 0.043           | 187   | 3.90E-15    | F      | RSALLESSPADPATLSEDEARLLLAALVQDYVQVMKASLEGEGERGSRRIAG                                | -      | K               |
| CD  |           | 5.6        | gE7885478  |                         | calcitonin gene-related peptide 1 precursor                             | 1010.2515  | 6  | 6056.0436     | 0.018           | 233   | 1.80E-19    | A      | APRSLAESPADPATLSEDEARLLLAALVQDYVQVMKASLEGEGERGSRRIAG                                | -      | K               |
| ETD |           | 5.6        | gE7885478  |                         | calcitonin gene-related peptide 1 precursor                             | 1010.3223  | 6  | 6056.0436     | 0.026           | 98    | 5.80E-06    | A      | APRSLAESPADPATLSEDEARLLLAALVQDYVQVMKASLEGEGERGSRRIAG                                | -      | K               |
| ETD |           | 3          | gE7885478  |                         | calcitonin gene-related peptide 1 precursor                             | 951.7905   | 3  | 2642.3187     | 0.008           | 74    | 0.00079     | A      | APRSLAESPADPATLSEDEARLL                                                             | -      | L               |
| ETD |           | 3.4        | gE7885478  |                         | calcitonin gene-related peptide 1 precursor                             | 986.7369   | 4  | 3142.9553     | 0.012           | 152   | 1.80E-11    | A      | APRSLAESPADPATLSEDEARLLLAALVQDYVQ                                                   | -      | M               |
| CD  |           | 4          | gE7885478  |                         | calcitonin gene-related peptide 1 precursor                             | 551.7795   | 4  | 2203.9902     | -0.011          | 59    | 0.002       | G      | MKASLEGEGERGSRRIAG                                                                  | -      | G               |
| ETD |           | 4          | gE7885478  |                         | calcitonin gene-related peptide 1 precursor                             | 735.7174   | 3  | 2203.9902     | 0.001</         |       |             |        |                                                                                     |        |                 |

|     |          |       |           |                                             |           |   |           |         |     |          |   |                                                          |   |
|-----|----------|-------|-----------|---------------------------------------------|-----------|---|-----------|---------|-----|----------|---|----------------------------------------------------------|---|
| ETD |          |       | gE7880478 | calcitonin gene-related peptide 1 precursor | 961.4953  | 3 | 2881.4556 | 0.0086  | 60  | 0.023    | R | SALESPADPATLSEDEARLLLAALVGD                              | Y |
| ETD | 3        | 4     | gE7880478 | calcitonin gene-related peptide 1 precursor | 839.1866  | 4 | 3352.7150 | 0.0103  | 208 | 3.80E-17 | A | APRRALLESPPADPATLSEDEARLLLAALVGD                         | Y |
| CD  |          |       | gE9443304 | calcitonin gene-related peptide 2 precursor | 1064.7405 | 5 | 5318.6463 | 0.0198  | 90  | 4.10E-05 | R | SALESPDPATLSEDEARLLLAALVGDYVQMKAELEGEQEIQSSSBAAG         | K |
| CD  | 5.6,7    | 5.6,7 | gE9443304 | calcitonin gene-related peptide 2 precursor | 1158.9913 | 5 | 5789.9057 | 0.0144  | 227 | 3.30E-19 | A | APRRALLESPPADPATLSEDEARLLLAALVGDYVQMKAELEGEQEIQSSSBAAG   | K |
| ETD | 5.6,7    | 5.6,7 | gE9443304 | calcitonin gene-related peptide 2 precursor | 965.9947  | 6 | 5789.9057 | 0.0191  | 158 | 5.80E-12 | A | APRRALLESPPADPATLSEDEARLLLAALVGDYVQMKAELEGEQEIQSSSBAAG   | K |
| CD  |          |       | gE4920245 | calcitonin precursor                        | 634.3118  | 3 | 1899.9122 | 0.0014  | 54  | 0.059    | D | LERDHRPHVMPQAN                                           | - |
| CD  |          |       | gE4920245 | calcitonin precursor                        | 706.6769  | 3 | 2189.0032 | 0.0057  | 62  | 0.0082   | M | DSLSLEDRHHRVMPQAN                                        | - |
| CD  | 3        | 3,4   | gE4920245 | calcitonin precursor                        | 812.6978  | 3 | 2436.0706 | 0.0011  | 61  | 0.0056   | R | DMSSLEDRHHRVMPQAN                                        | - |
| ETD | 3        | 3,4   | gE4920245 | calcitonin precursor                        | 609.7762  | 4 | 2436.0706 | -0.0049 | 93  | 3.40E-06 | R | DMSSLEDRHHRVMPQAN                                        | - |
| ETD |          |       | gE4920245 | calcitonin precursor                        | 948.8000  | 4 | 2931.1717 | -0.0028 | 58  | 0.016    | K | RMSSLEDRHHRVMPQAN                                        | - |
| ETD |          |       | gE4920245 | calcitonin precursor                        | 751.8851  | 3 | 2348.9806 | 0.0029  | 73  | 0.0039   | R | DMSSLEDRHHRVMPQAN                                        | - |
| CD  |          |       | gE4920245 | calcitonin precursor                        | 721.3836  | 3 | 1440.7614 | 0.0012  | 27  | 0.0020   | K | YTFPTQTADYVAP                                            | G |
| ETD | 2        | 3     | gE4920245 | calcitonin precursor                        | 9615700   | 3 | 1482.8980 | -0.0011 | 67  | 2.60E-05 | F | WYHTFPTQTADYVAP                                          | G |
| CD  | 2        | 3     | gE4920245 | calcitonin precursor                        | 942.6535  | 2 | 1482.8980 | 0.0031  | 67  | 0.0026   | F | WYHTFPTQTADYVAP                                          | G |
| ETD |          |       | gE4920245 | calcitonin precursor                        | 610.9261  | 3 | 1829.9577 | -0.0031 | 75  | 0.00054  | D | FNKHTFPTQTADYVAP                                         | G |
| ETD |          |       | gE4920245 | calcitonin precursor                        | 725.7052  | 3 | 2174.0909 | 0.0029  | 96  | 5.40E-06 | Y | YDQFNKHTFPTQTADYVAP                                      | G |
| CD  | 2,3      | 3     | gE4920245 | calcitonin precursor                        | 1169.5874 | 2 | 2337.1542 | 0.0060  | 73  | 0.00091  | T | YTDQFNKHTFPTQTADYVAP                                     | G |
| ETD | 2,3      | 3     | gE4920245 | calcitonin precursor                        | 780.0611  | 3 | 2337.1542 | 0.0073  | 88  | 2.90E-05 | T | YTDQFNKHTFPTQTADYVAP                                     | G |
| ETD |          |       | gE4920245 | calcitonin precursor                        | 813.7426  | 3 | 2438.2019 | 0.0042  | 82  | 0.00013  | G | TYTDQFNKHTFPTQTADYVAP                                    | G |
| ETD |          |       | gE4920245 | calcitonin precursor                        | 832.7513  | 3 | 2436.2234 | 0.0085  | 59  | 0.026    | L | QTYDQFNKHTFPTQTADYVAP                                    | G |
| ETD |          |       | gE4920245 | calcitonin precursor                        | 486.5525  | 3 | 1456.6365 | -0.0009 | 57  | 0.012    | R | DMSSLEDRHHR                                              | H |
| CD  |          |       | gE4920245 | calcitonin precursor                        | 649.6408  | 3 | 1945.8977 | 0.0029  | 84  | 5.40E-05 | E | LEGEQEREQSSLDSPRS                                        | K |
| ETD | 3        | 3     | gE4920245 | calcitonin precursor                        | 721.6650  | 3 | 2161.9723 | 0.0010  | 82  | 6.50E-05 | A | SELEGEQEREQSSLDSPRS                                      | K |
| CD  | 3        | 3     | gE4920245 | calcitonin precursor                        | 721.6657  | 3 | 2161.9723 | 0.0030  | 61  | 0.0084   | A | SELEGEQEREQSSLDSPRS                                      | K |
| CD  | 2,3      | 3     | gE4920245 | calcitonin precursor                        | 745.3445  | 3 | 2233.0094 | 0.0022  | 139 | 1.20E-10 | K | ASLEGEQEREQSSLDSPRS                                      | K |
| ETD | 2,3      | 3     | gE4920245 | calcitonin precursor                        | 745.3447  | 3 | 2233.0094 | 0.0028  | 103 | 5.20E-07 | K | ASLEGEQEREQSSLDSPRS                                      | K |
| ETD | 3,4      | 3,4   | gE4920245 | calcitonin precursor                        | 591.2834  | 4 | 2361.1044 | 0.0000  | 158 | 2.30E-12 | M | KASLEGEQEREQSSLDSPRS                                     | K |
| CD  | 3,4      | 3,4   | gE4920245 | calcitonin precursor                        | 788.0238  | 3 | 2361.1044 | 0.0052  | 124 | 6.00E-09 | M | KASLEGEQEREQSSLDSPRS                                     | K |
| CD  |          |       | gE4920245 | calcitonin precursor                        | 881.2713  | 3 | 2462.1448 | -0.0027 | 133 | 5.50E-10 | G | MAASLEGEQEREQSSLDSPRS                                    | K |
| ETD | 3,4      | 3,4   | gE4920245 | calcitonin precursor                        | 524.0439  | 4 | 2462.1448 | 0.0017  | 176 | 3.10E-14 | G | MAASLEGEQEREQSSLDSPRS                                    | K |
| ETD | 3,4      | 4     | gE4920245 | calcitonin precursor                        | 880.0367  | 4 | 2719.2719 | 0.0017  | 131 | 1.10E-08 | Y | VYQMAKAELEGEQEREQSSLDSPRS                                | K |
| CD  | 3,4      | 4     | gE4920245 | calcitonin precursor                        | 907.4320  | 3 | 2719.2719 | 0.0044  | 69  | 0.0018   | Y | VYQMAKAELEGEQEREQSSLDSPRS                                | K |
| ETD | 3        | 3     | gE4920245 | calcitonin precursor                        | 961.7873  | 3 | 2882.3352 | 0.0049  | 56  | 0.037    | D | VYQMAKAELEGEQEREQSSLDSPRS                                | K |
| CD  | 3        | 3     | gE4920245 | calcitonin precursor                        | 961.7878  | 3 | 2882.3352 | 0.0063  | 128 | 2.20E-09 | D | VYQMAKAELEGEQEREQSSLDSPRS                                | K |
| CD  | 3,4      | 4     | gE4920245 | calcitonin precursor                        | 955.7348  | 4 | 3818.8996 | 0.0104  | 159 | 3.80E-12 | R | LLLAALVQDYVQMKAELEGEQEREQSSLDSPRS                        | K |
| ETD | 3,4      | 4     | gE4920245 | calcitonin precursor                        | 955.7345  | 4 | 3818.8996 | 0.0094  | 113 | 1.60E-07 | R | LLLAALVQDYVQMKAELEGEQEREQSSLDSPRS                        | K |
| CD  | 4.6, 5.6 | 5.6   | gE4920245 | calcitonin precursor                        | 978.6891  | 5 | 4888.4036 | 0.0057  | 225 | 1.10E-18 | D | PATLSEDEARLLLAALVQDYVQMKAELEGEQEREQSSLDSPRS              | K |
| ETD | 4.6, 5.6 | 5.6   | gE4920245 | calcitonin precursor                        | 815.7431  | 6 | 4888.4036 | 0.0111  | 174 | 1.20E-13 | D | PATLSEDEARLLLAALVQDYVQMKAELEGEQEREQSSLDSPRS              | K |
| CD  |          |       | gE4920245 | calcitonin precursor                        | 1293.8910 | 4 | 5171.5204 | 0.0145  | 181 | 2.80E-14 | S | PADPATLSEDEARLLLAALVQDYVQMKAELEGEQEREQSSLDSPRS           | K |
| ETD | 5        | 5     | gE4920245 | calcitonin precursor                        | 1118.5505 | 5 | 5587.7111 | 0.0050  | 78  | 0.00046  | A | LESPPADPATLSEDEARLLLAALVQDYVQMKAELEGEQEREQSSLDSPRS       | K |
| CD  | 5        | 5     | gE4920245 | calcitonin precursor                        | 1118.5517 | 5 | 5587.7111 | 0.0110  | 178 | 4.70E-14 | A | LESPPADPATLSEDEARLLLAALVQDYVQMKAELEGEQEREQSSLDSPRS       | K |
| CD  | 5.6      | 5     | gE4920245 | calcitonin precursor                        | 1150.1648 | 5 | 5745.7802 | 0.0074  | 123 | 1.50E-08 | R | SALESPADPATLSEDEARLLLAALVQDYVQMKAELEGEQEREQSSLDSPRS      | K |
| ETD | 5.6      | 5     | gE4920245 | calcitonin precursor                        | 1150.1656 | 5 | 5745.7802 | 0.0114  | 88  | 4.90E-05 | R | SALESPADPATLSEDEARLLLAALVQDYVQMKAELEGEQEREQSSLDSPRS      | K |
| CD  |          |       | gE4920245 | calcitonin precursor                        | 1181.3859 | 5 | 5901.8813 | 0.0118  | 137 | 3.30E-10 | F | FRSALESPPADPATLSEDEARLLLAALVQDYVQMKAELEGEQEREQSSLDSPRS   | K |
| ETD | 5.6      |       | gE4920245 | calcitonin precursor                        | 1210.8013 | 5 | 6049.9498 | 0.0094  | 155 | 1.10E-11 | P | FRSALESPPADPATLSEDEARLLLAALVQDYVQMKAELEGEQEREQSSLDSPRS   | K |
| ETD | 5.6,7.8  | 6,7   | gE4920245 | calcitonin precursor                        | 889.1589  | 7 | 6217.0396 | 0.0220  | 159 | 5.00E-12 | A | APRRALLESPPADPATLSEDEARLLLAALVQDYVQMKAELEGEQEREQSSLDSPRS | K |
| CD  | 5.6,7.8  | 6,7   | gE4920245 | calcitonin precursor                        | 1027.1832 | 6 | 6217.0396 | 0.0159  | 246 | 1.30E-19 | A | APRRALLESPPADPATLSEDEARLLLAALVQDYVQMKAELEGEQEREQSSLDSPRS | K |
| ETD |          |       | gE4920245 | calcitonin precursor                        | 1496.8997 | 6 | 6297.9969 | 0.0098  | 85  | 0.0196   | A | APRRALLESPPADPATLSEDEARLLLAALVQDYVQMKAELEGEQEREQSSLDSPRS | K |
| ETD | 3,4      | 3,4   | gE4920245 | calcitonin precursor                        | 445.9560  | 4 | 1779.7958 | -0.0010 | 72  | 0.00052  | R | DMSSLEDRHHRVMPQ                                          | N |
| ETD |          |       | gE4920245 | calcitonin precursor                        | 534.9341  | 4 | 2135.9477 | -0.0004 | 103 | 3.20E-07 | R | DMSSLEDRHHRVMPQ                                          | N |
| CD  | 3        | 3,4   | gE4920245 | calcitonin precursor                        | 714.8447  | 3 | 2321.0277 | 0.0044  | 56  | 0.018    | R | DMSSLEDRHHRVMPQAN                                        | N |
| ETD | 3        | 3,4   | gE4920245 | calcitonin precursor                        | 581.2640  | 4 | 2321.0277 | -0.0027 | 103 | 8.80E-07 | R | DMSSLEDRHHRVMPQAN                                        | N |
| ETD |          |       | gE4920245 | calcitonin precursor                        | 923.7791  | 4 | 2507.8981 | -0.0019 | 59  | 0.0094   | R | DMSSLEDRHHRVMPQAN                                        | Q |
| CD  |          |       | gE4920245 | calcitonin precursor                        | 880.7417  | 3 | 2639.2020 | 0.0011  | 113 | 5.80E-08 | D | VYQMAKAELEGEQEREQSSLDSP                                  | R |
| ETD | 4.5      |       | gE4920245 | calcitonin precursor                        | 1162.3273 | 4 | 4645.2704 | 0.0097  | 119 | 3.60E-08 | D | PATLSEDEARLLLAALVQDYVQMKAELEGEQEREQSSLDSP                | R |
| ETD | 5.6      | 5.6,7 | gE4920245 | calcitonin precursor                        | 996.6813  | 6 | 5973.9065 | 0.0174  | 134 | 1.50E-09 | A | APRRALLESPPADPATLSEDEARLLLAALVQDYVQMKAELEGEQEREQSSLDSP   | R |
| CD  | 5.6      | 5.6,7 | gE4920245 | calcitonin precursor                        | 996.6823  | 6 | 5973.9065 | 0.0237  | 175 | 1.20E-13 | A | APRRALLESPPADPATLSEDEARLLLAALVQDYVQMKAELEGEQEREQSSLDSP   | R |
| CD  |          |       | gE4920245 | calcitonin precursor                        | 1058.5331 | 6 | 6345.1346 | 0.0204  | 106 | 9.50E-07 | A | APRRALLESPPADPATLSEDEARLLLAALVQDYVQMKAELEGEQEREQSSLDSP   | R |
| CD  |          |       | gE4920245 | calcitonin precursor                        | 716.3334  | 3 | 2145.9774 | 0.0010  | 98  | 1.80E-06 | K | ASLEGEQEREQSSLDSPRS                                      | S |
| CD  |          |       | gE4920245 | calcitonin precursor                        | 1101.1489 | 5 | 5920.6791 | 0.0291  | 61  | 0.042    | A | LESPPADPATLSEDEARLLLAALVQDYVQMKAELEGEQEREQSSLDSPRS       | S |
| CD  |          |       | gE4920245 | calcitonin precursor                        | 1158.9769 | 5 | 5789.8217 | 0.0264  | 94  | 1.30E-05 | A | APRRALLESPPADPATLSEDEARLLLAALVQDYVQMKAELEGEQEREQSSLDSP   | S |
| CD  |          |       | gE4920245 | calcitonin precursor                        | 1227.0118 | 5 | 6130.0076 | 0.0150  | 63  | 0.018    | A | APRRALLESPPADPATLSEDEARLLLAALVQDYVQMKAELEGEQEREQSSLDSPRS | S |
| CD  |          |       | gE7880478 | calcitonin/CSRP-1                           | 1001.5195 | 4 | 4002.2408 | 0.0081  | 98  | 4.10E-06 | A | APRRALLESPPADPATLSEDEARLLLAALVQDYVQMK                    | A |
| CD  |          |       | gE7880478 | calcitonin/CSRP-1                           | 1135.2392 | 3 | 3402.6864 | 0.0094  | 86  | 6.90E-05 | R | SALESPADPATLSEDEARLLLAALVQDYVQMK                         | K |
| CD  | 3,4      |       | gE7880478 | calcitonin/CSRP-1                           | 1292.2364 | 3 | 3873.9458 | 0.0116  | 125 | 8.20E-09 | A | APRRALLESPPADPATLSEDEARLLLAALVQDYVQMK                    | K |
| CD  |          |       | gE4920245 | calcitonin/CSRP-1                           | 957.8484  | 2 | 1113.8927 | -0.0003 | 62  | 0.0091   | D | PATLSEDEARLL                                             | L |
| CD  |          |       | gE7880478 | calcitonin/CSRP-1                           | 1007.0545 | 2 | 2016.8807 | 0.0041  | 61  | 0.0010   | A | LESPPADPATLSEDEARLL                                      | L |
| CD  |          |       | gE4920245 | calcitonin/CSRP-1                           | 260.2900  | 3 | 2416.1036 | -0.0005 | 60  | 1.50E-05 | A | APRRALLESPPADPATLSEDEAR                                  | L |
| CD  | 3        | 3     | gE7880478 | calcitonin/CSRP-1                           | 881.7381  | 3 | 2643.3187 | 0.0051  | 130 | 2.20E-08 | A | APRRALLESPPADPATLSEDEARLL                                | L |
| CD  |          |       | gE4920245 | calcitonin/CSRP-1                           | 966.8398  | 3 | 2987.4770 | 0.0030  | 84  | 8.60E-05 | A | APRRALLESPPADPATLSEDEARLLLA                              | L |
| CD  | 3,4      | 4,5   | gE7880478 | calcitonin/CSRP-1                           | 1248.4566 | 3 | 3742.3053 | 0.0098  | 87  | 5.00E-05 | A | APRRALLESPPADPATLSEDEARLLLAALVQDYVQMK                    | M |
| CD  |          |       | gE4920245 | calcitonin/CSRP-1                           | 674.3311  | 2 | 1346.6466 | 0.0010  | 70  | 0.0012   | A | APRRALLESPPAD                                            | P |
| CD  |          |       | gE7880478 | calcitonin/CSRP-1                           | 1198.1058 | 4 | 4788.3803 | 0.0138  | 122 | 2.10E-08 | A | APRRALLESPPADPATLSEDEARLLLAALVQDYVQMKAELEGE              | Q |
| CD  |          |       | gE4920245 | calcitonin/CSRP-1                           | 1131.0340 | 2 | 2260.0496 | 0.0039  | 87  | 2.70E-05 | A | APRRALLESPPADPATLSEDEA                                   | R |
| CD  |          |       | gE7880478 | calcitonin/CSRP-1                           | 1144.5669 | 4 | 4574.2221 | 0.0164  | 115 | 1.00E-07 | R | SALESPADPATLSEDEARLLLAALVQDYVQMKAELEGE                   | R |
| CD  | 4.6      |       | gE7880478 | calcitonin/CSRP-1                           | 1262.3796 | 4 | 5045.4815 | 0.0078  | 179 | 3.90E-14 | A | APRRALLESPPADPATLSEDEARLLLAALVQDYVQMKAELEGE              | R |
| CD  |          |       | gE4920245 | calcitonin/CSRP-1                           | 913.4563  | 6 | 5474.6787 | 0.0157  | 103 | 2.00E-06 | A | APRRALLESPPADPATLSEDEARLLLAALVQDYVQMKAELEGEQEREQSSLDSP   | S |
| CD  |          |       | gE7880478 | calcitonin/CSRP-1                           | 1172.3668 | 3 | 3815.7783 | 0.0102  | 86  | 6.40E-05 | A | APRRALLESPPADPATLSEDEARLLLAALVQDY                        | S |
| CD  | 2,3      | 3     | gE7880478 | calcitonin/CSRP-1                           | 1013.0479 | 2 | 2024.0789 | 0.0023  | 68  | 0.0021   | D | PATLSEDEARLLLAALVGD                                      | Y |
| ETD | 2,3      | 3     | gE7880478 | calcitonin/CSRP-1                           | 675.7011  | 3 | 2024.0789 | 0.0026  | 123 | 6.60E-09 | D | PATLSEDEARLLLAALVGD                                      | Y |

Phospho (37)



|     |         |        |              |              |           |           |           |         |          |          |                                                      |                                                      |   |
|-----|---------|--------|--------------|--------------|-----------|-----------|-----------|---------|----------|----------|------------------------------------------------------|------------------------------------------------------|---|
| CD  |         | g18439 | Chromosome B | 953.2316     | 5         | 4761.1159 | 0.0057    | 69      | 0.00075  | R        | DPADAIAEHSRRIEAGAPQEDDQPTKADTKWAGDQHRER              | A                                                    |   |
| CD  |         | g18439 | Chromosome B | 985.6281     | 5         | 4923.0986 | 0.0057    | 90      | 1.90E-08 | R        | EDEEEENYKQGEQSESEKHEEPQTONAFNERG                     | A                                                    |   |
| CD  |         | g18439 | Chromosome B | 826.1992     | 6         | 4951.1411 | 0.0104    | 76      | 7.90E-05 | R        | EDEEEENYKQGEQSESEKHEEPQTONAFNERG                     | A                                                    |   |
| ETD | 5       | 5      | g18439       | Chromosome B | 1017.2422 | 5         | 5081.1677 | 0.0069  | 110      | 2.00E-08 | R                                                    | EDEEEENYKQGEQSESEKHEEPQTONAFNERGAS                   | A |
| CD  | 5       | 5      | g18439       | Chromosome B | 1017.2432 | 5         | 5081.1677 | 0.0119  | 138      | 3.00E-11 | R                                                    | EDEEEENYKQGEQSESEKHEEPQTONAFNERGAS                   | A |
| CD  |         | g18439 | Chromosome B | 852.5434     | 6         | 5109.2103 | 0.0063    | 122     | 2.00E-09 | R        | EDEEEENYKQGEQSESEKHEEPQTONAFNERGAS                   | A                                                    |   |
| CD  | 5.6,7   | 6.8    | g18439       | Chromosome B | 999.6296  | 6         | 5991.7165 | 0.0178  | 175      | 2.80E-14 | R                                                    | EDEEEENYKQGEQSESEKHEEPQTONAFNERGASAKKELY             | A |
| ETD | 5.6,7   | 6.8    | g18439       | Chromosome B | 999.6297  | 6         | 5991.7165 | 0.0181  | 128      | 1.50E-09 | R                                                    | EDEEEENYKQGEQSESEKHEEPQTONAFNERGASAKKELY             | A |
| ETD | 6,7     | 6,7    | g18439       | Chromosome B | 1004.0053 | 6         | 6019.7590 | 0.0292  | 182      | 9.40E-15 | R                                                    | EDEEEENYKQGEQSESEKHEEPQTONAFNERGASAKKELY             | A |
| CD  | 6,7     | 6,7    | g18439       | Chromosome B | 1004.0058 | 6         | 6019.7590 | 0.0282  | 90       | 2.10E-05 | R                                                    | EDEEEENYKQGEQSESEKHEEPQTONAFNERGASAKKELY             | A |
| CD  | 6,7     | 6,7    | g18439       | Chromosome B | 884.3790  | 7         | 6847.3972 | 0.0150  | 80       | 0.00116  | F                                                    | QDAWELLDNYLYYEGSAPWWOODGLDTHNREASRFDQYDSHIT          | A |
| CD  | 6,7     | 6,7    | g18439       | Chromosome B | 902.8556  | 7         | 6288.9554 | 0.0120  | 79       | 0.00022  | R                                                    | WQDAWELLDNYLYYEGSAPWWOODGLDTHNREASRFDQYDSHIT         | A |
| ETD | 6,7     | 6,7    | g18439       | Chromosome B | 1005.8009 | 6         | 6288.9554 | 0.0163  | 166      | 3.80E-13 | R                                                    | WQDAWELLDNYLYYEGSAPWWOODGLDTHNREASRFDQYDSHIT         | A |
| ETD | 6,7     | 6,7    | g18439       | Chromosome B | 1141.6987 | 6         | 6844.1367 | 0.0119  | 54       | 0.045    | R                                                    | HSEKSDREDEEENYKQGEQSESEKHEEPQTONAFNERGASAKKELY       | A |
| CD  | 6,7     | 6,6    | g18439       | Chromosome B | 978.7453  | 7         | 6844.1367 | 0.0158  | 111      | 8.00E-08 | R                                                    | HSEKSDREDEEENYKQGEQSESEKHEEPQTONAFNERGASAKKELY       | A |
| CD  |         | g18439 | Chromosome B | 982.7497     | 7         | 6872.1792 | 0.0179    | 75      | 0.00048  | R        | HSEKSDREDEEENYKQGEQSESEKHEEPQTONAFNERGASAKKELY       | A                                                    |   |
| ETD | 2       | 3,4    | g18439       | Chromosome B | 561.2677  | 3         | 1680.7791 | 0.0021  | 89       | 1.50E-05 | R                                                    | FLGQHRVGNQMD                                         | D |
| CD  | 2       | 3,4    | g18439       | Chromosome B | 841.3996  | 2         | 1680.7791 | 0.0057  | 58       | 0.021    | R                                                    | FLGQHRVGNQMD                                         | D |
| CD  |         | g18439 | Chromosome B | 1222.9373    | 5         | 6109.6463 | 0.0038    | 60      | 3.60E-02 | R        | AEEEPYSEKQYQVQVQPELEWERYRQSGSEYRAPPQSEEWZEE          | D                                                    |   |
| CD  | 6       | 6,7    | g18439       | Chromosome B | 1054.1265 | 6         | 6318.7185 | -0.0032 | 145      | 1.80E-09 | R                                                    | BETHAAHQEKTHREKSGSESEASDENPQEKQDPSSESEGEDATSEY       | D |
| ETD | 6       | 6,7    | g18439       | Chromosome B | 1054.1265 | 6         | 6318.7185 | -0.0032 | 94       | 0.00024  | R                                                    | BETHAAHQEKTHREKSGSESEASDENPQEKQDPSSESEGEDATSEY       | D |
| CD  |         | g18439 | Chromosome B | 781.0487     | 3         | 2340.1215 | 0.0026    | 71      | 0.0015   | R        | LQELFNPTYDQWKSDF                                     | E                                                    |   |
| ETD |         | g18439 | Chromosome B | 545.9815     | 3         | 1633.7525 | 0.0003    | 58      | 0.017    | F        | NFTYDQWKSDF                                          | F                                                    |   |
| ETD | 3       | 3      | g18439       | Chromosome B | 694.3310  | 3         | 2079.9690 | 0.0021  | 74       | 0.00048  | L                                                    | GELFNPTYDQWKSDF                                      | F |
| CD  | 3       | 3      | g18439       | Chromosome B | 694.3331  | 3         | 2079.9690 | 0.0084  | 65       | 0.0042   | L                                                    | GELFNPTYDQWKSDF                                      | F |
| ETD | 3       | 3      | g18439       | Chromosome B | 732.0258  | 3         | 2180.0531 | 0.0025  | 85       | 6.10E-05 | R                                                    | LQELFNPTYDQWKSDF                                     | F |
| CD  | 3       | 3      | g18439       | Chromosome B | 732.0263  | 3         | 2180.0531 | 0.0038  | 97       | 3.70E-08 | R                                                    | LQELFNPTYDQWKSDF                                     | F |
| ETD | 4       | 4      | g18439       | Chromosome B | 603.3200  | 4         | 2477.2981 | 0.0011  | 110      | 2.00E-07 | R                                                    | KRLLELFPYDQWKSDF                                     | F |
| ETD | 4       | 4      | g18439       | Chromosome B | 603.3201  | 4         | 2477.2981 | 0.0020  | 92       | 1.40E-05 | R                                                    | KRLLELFPYDQWKSDF                                     | F |
| CD  |         | g18439 | Chromosome B | 465.2314     | 3         | 1516.6774 | 0.0020    | 60      | 0.0007   | L        | QDAWELLDNYLYYEGSAPWWOODGLDTHNREASRFDQYDSHIT          | A                                                    |   |
| ETD | 3,4     | 4      | g18439       | Chromosome B | 444.9449  | 4         | 2574.3475 | 0.0001  | 84       | 6.70E-05 | K                                                    | ELENAAMLELQIAEKYDQR                                  | G |
| CD  | 3,4     | 4      | g18439       | Chromosome B | 444.9462  | 4         | 2574.3475 | 0.0041  | 102      | 1.10E-06 | K                                                    | ELENAAMLELQIAEKYDQR                                  | G |
| ETD | 3,4     | 4      | g18439       | Chromosome B | 885.9101  | 4         | 3539.6116 | -0.0044 | 71       | 0.00078  | R                                                    | AEEEPYSEKQYQVQVQPELEWERYR                            | G |
| CD  | 3,4     | 4      | g18439       | Chromosome B | 885.9110  | 4         | 3539.6116 | 0.0033  | 113      | 4.90E-08 | R                                                    | AEEEPYSEKQYQVQVQPELEWERYR                            | G |
| ETD | 3,4     | 3,4    | g18439       | Chromosome B | 889.4163  | 4         | 3553.6273 | 0.0089  | 162      | 7.80E-13 | R                                                    | AEEEPYSEKQYQVQVQPELEWERYR                            | G |
| CD  | 3,4     | 3,4    | g18439       | Chromosome B | 1185.5429 | 3         | 3553.6273 | 0.0096  | 184      | 5.60E-15 | R                                                    | AEEEPYSEKQYQVQVQPELEWERYR                            | G |
| ETD | 4.6,6   | 5,6    | g18439       | Chromosome B | 758.3587  | 5         | 3786.7556 | 0.0013  | 216      | 3.80E-18 | R                                                    | NYPQLEKQMAHGYESEEERLEPQKHRR                          | G |
| CD  | 4.6,6   | 5,6    | g18439       | Chromosome B | 947.6974  | 4         | 3786.7556 | 0.0048  | 174      | 6.90E-14 | R                                                    | NYPQLEKQMAHGYESEEERLEPQKHRR                          | G |
| ETD | 5.6,7.8 | 7.8,9  | g18439       | Chromosome B | 775.3759  | 9         | 6969.3049 | 0.0130  | 109      | 3.00E-07 | K                                                    | SAEFPYDSEFPVTHGEAENKQRADDTVLEDEKKELENAAMLELQIAEKYDQR | G |
| CD  | 5.6,7.8 | 7.8,9  | g18439       | Chromosome B | 1162.5621 | 6         | 6969.3049 | 0.0240  | 187      | 5.00E-10 | K                                                    | SAEFPYDSEFPVTHGEAENKQRADDTVLEDEKKELENAAMLELQIAEKYDQR | G |
| CD  |         | g18439 | Chromosome B | 1175.8871    | 6         | 7049.2713 | 0.0076    | 94      | 1.90E-05 | K        | SAEFPYDSEFPVTHGEAENKQRADDTVLEDEKKELENAAMLELQIAEKYDQR | G                                                    |   |
| CD  |         | g18439 | Chromosome B | 641.3024     | 3         | 1920.8813 | 0.0039    | 67      | 0.0003   | G        | YGESEERLEPQKHRR                                      | H                                                    |   |
| CD  |         | g18439 | Chromosome B | 1029.0092    | 2         | 2055.9842 | 0.0097    | 70      | 0.0018   | R        | LQELFNPTYDQWKSDF                                     | H                                                    |   |
| ETD | 5.6     | 5,6    | g18439       | Chromosome B | 859.7092  | 6         | 5152.2048 | 0.0065  | 152      | 1.30E-12 | R                                                    | EDEEEENYKQGEQSESEKHEEPQTONAFNERGAS                   | I |
| CD  | 5.6     | 5,6    | g18439       | Chromosome B | 1031.4504 | 5         | 5152.2048 | 0.0108  | 181      | 1.70E-15 | R                                                    | EDEEEENYKQGEQSESEKHEEPQTONAFNERGAS                   | I |
| CD  |         | g18439 | Chromosome B | 858.8118     | 7         | 6004.6250 | 0.0064    | 127     | 6.40E-10 | R        | HSEKSDREDEEENYKQGEQSESEKHEEPQTONAFNERGAS             | I                                                    |   |
| CD  |         | g18439 | Chromosome B | 969.8462     | 2         | 1137.6870 | -0.0052   | 57      | 0.0003   | R        | NLAKVYKDL                                            | K                                                    |   |
| CD  |         | g18439 | Chromosome B | 804.9489     | 2         | 1947.9198 | 0.0071    | 68      | 0.0069   | R        | AFYMDITREE                                           | K                                                    |   |
| CD  |         | g18439 | Chromosome B | 821.3850     | 2         | 1640.7511 | 0.0043    | 56      | 0.024    | L        | GELFNPTYDQWKSDF                                      | K                                                    |   |
| CD  |         | g18439 | Chromosome B | 827.496      | 2         | 1673.8805 | 0.0042    | 85      | 8.00E-06 | R        | APPOSEEWDEED                                         | K                                                    |   |
| ETD | 3       | 3      | g18439       | Chromosome B | 882.3183  | 3         | 1743.7522 | 0.0010  | 74       | 0.0002   | R                                                    | QSEPRAYFMIDTREE                                      | K |
| CD  | 3       | 3      | g18439       | Chromosome B | 882.3183  | 3         | 1743.7522 | 0.0038  | 56       | 0.014    | R                                                    | QSEPRAYFMIDTREE                                      | K |
| ETD | 2       | 3,4    | g18439       | Chromosome B | 449.9385  | 4         | 1795.8080 | -0.0010 | 100      | 9.70E-07 | R                                                    | FLGQHRVGNQMD                                         | K |
| CD  | 2       | 3,4    | g18439       | Chromosome B | 898.9111  | 2         | 1795.8080 | 0.0017  | 74       | 0.00036  | R                                                    | FLGQHRVGNQMD                                         | K |
| ETD | 3       | 3,4    | g18439       | Chromosome B | 490.2259  | 4         | 1956.8748 | -0.0003 | 103      | 4.40E-07 | R                                                    | GRQGEPRAYFMIDTREE                                    | K |
| CD  | 3       | 3,4    | g18439       | Chromosome B | 652.2990  | 3         | 1956.8748 | 0.0004  | 67       | 0.0015   | R                                                    | GRQGEPRAYFMIDTREE                                    | K |
| ETD |         | g18439 | Chromosome B | 516.4862     | 4         | 2061.9140 | 0.0016    | 105     | 2.50E-07 | R        | LEAFQKQYDSHITAE                                      | X                                                    |   |
| ETD |         | g18439 | Chromosome B | 529.2523     | 4         | 2112.9759 | 0.0041    | 78      | 0.00021  | H        | RQRQGEPRAYFMIDTREE                                   | X                                                    |   |
| CD  | 2,3     | 3      | g18439       | Chromosome B | 799.3357  | 3         | 2394.9836 | 0.0017  | 84       | 8.70E-06 | R                                                    | QSEYRAPPQSEEWDEED                                    | K |
| ETD | 2,3     | 3      | g18439       | Chromosome B | 799.3366  | 3         | 2394.9836 | 0.0044  | 62       | 0.0015   | R                                                    | QSEYRAPPQSEEWDEED                                    | K |
| CD  |         | g18439 | Chromosome B | 961.0864     | 3         | 2880.2282 | 0.0091    | 75      | 0.00012  | R        | DPADAIAEHSRRIEAGAPQEDDQPTKADTKWAGDQHRER              | K                                                    |   |
| ETD | 4,6     | 5,6    | g18439       | Chromosome B | 633.0051  | 5         | 3162.4914 | -0.0021 | 138      | 2.50E-10 | R                                                    | GLEPKQRHRRGRQGEPRAYFMIDTREE                          | K |
| ETD | 5,6     |        | g18439       | Chromosome B | 637.3128  | 5         | 3181.5336 | -0.0040 | 176      | 5.30E-14 | R                                                    | GLEPKQRHRRGRQGEPRAYFMIDTREE                          | K |
| ETD | 3       | 4      | g18439       | Chromosome B | 801.6042  | 4         | 3202.3844 | 0.0032  | 182      | 2.80E-15 | R                                                    | SSQGLSPREXQVQSESEBNVMAALGE                           | K |
| CD  | 3       | 4      | g18439       | Chromosome B | 1068.4710 | 3         | 3202.3844 | 0.0068  | 107      | 9.70E-08 | R                                                    | SSQGLSPREXQVQSESEBNVMAALGE                           | K |
| CD  | 4       | 4,5    | g18439       | Chromosome B | 836.6469  | 4         | 3242.5000 | -0.0051 | 121      | 1.20E-08 | G                                                    | QSESEKHEEPQTONAFNERGASAI                             | K |
| ETD | 4       | 4,5    | g18439       | Chromosome B | 836.6469  | 4         | 3242.5000 | 0.0001  | 105      | 4.00E-10 | G                                                    | QSESEKHEEPQTONAFNERGASAI                             | K |
| ETD |         | g18439 | Chromosome B | 865.0028     | 5         | 3244.5794 | -0.0001   | 120     | 1.10E-08 | G        | QDQGLDTHNREASRFDQYDSHITAE                            | K                                                    |   |
| CD  |         | g18439 | Chromosome B | 863.9443     | 4         | 3317.8001 | 0.0082    | 80      | 2.50E-05 | R        | WQDAWELLDNYLYYEGSAPWWOODGLDTHNREASRFDQYDSHIT         | K                                                    |   |
| CD  | 4       | 4      | g18439       | Chromosome B | 1040.2045 | 4         | 4156.7781 | 0.0108  | 88       | 4.20E-06 | K                                                    | SAEFPYDSEFPVTHGEAENKQRADDTVLEDEKKELENAAMLELQIAEKYDQR | K |
| ETD | 4       | 4      | g18439       | Chromosome B | 1040.2046 | 4         | 4156.7781 | 0.0112  | 52       | 0.018    | K                                                    | SAEFPYDSEFPVTHGEAENKQRADDTVLEDEKKELENAAMLELQIAEKYDQR | K |
| ETD | 4       | 4      | g18439       | Chromosome B | 1087.4523 | 4         | 4345.7722 | 0.0079  | 89       | 1.20E-06 | S                                                    | QGESEASDENPQEKQDPSSESEGEDATSEY                       | K |
| CD  | 4       | 4      | g18439       | Chromosome B | 1087.4528 | 4         | 4345.7722 | 0.0139  | 63       | 0.0005   | S                                                    | QGESEASDENPQEKQDPSSESEGEDATSEY                       | K |
| ETD |         | g18439 | Chromosome B | 760.1885     | 6         | 4555.0820 | 0.0054    | 104     | 4.00E-07 | M        | AHQYSESEERLEPQKHRRGRQGEPRAYFMIDTREE                  | K                                                    |   |
| ETD | 5,6     | 5      | g18439       | Chromosome B | 1054.0661 | 5         | 5265.2889 | 0.0052  | 65       | 0.0011   | R                                                    | EDEEEENYKQGEQSESEKHEEPQTONAFNERGASAI                 | K |
| CD  | 5,6     | 5      | g18439       | Chromosome B | 1054.0673 | 5         | 5265.2889 | 0.0112  | 168      | 5.80E-14 | R                                                    | EDEEEENYKQGEQSESEKHEEPQTONAFNERGASAI                 | K |
| ETD | 5,6     | 6      | g18439       | Chromosome B | 883.2298  | 6         | 5293.3314 | 0.0038  | 225      | 1.50E-19 | R                                                    | EDEEEENYKQGEQSESEKHEEPQTONAFNERGASAI                 | K |
| CD  | 5,6     | 6      | g18439       | Chromosome B | 883.2305  | 6         | 5293.3314 | 0.0076  | 104      | 1.70E-07 | R                                                    | EDEEEENYKQGEQSESEKHEEPQTONAFNERGASAI                 | K |
| CD  | 6,7     | 6      | g18439       | Chromosome B | 955.4431  | 6         | 5726.6039 | 0.0109  | 79       | 0.00013  | R                                                    | NYPQLEKQMAHGYESEEERLEPQKHRRGRQGEPRAYFMIDTREE         | K |
| CD  | 6,7     | 6      | g18439       | Chromosome B | 821.8139  | 7         | 5745.6461 | 0.0004  | 64       | 0.0056   | R                                                    | NYPQLEKQMAHGYESEEERLEPQKHRRGRQGEPRAYFMIDTREE         | K |

Chr-Yp10-Qu (W-term D)

Phashe (ST)

Antiband (C-term): Chr-Yp10-Qu (W-term D)

Antiband (C-term)

Antiband (C-term)

Antiband (C-term)

Antiband (C-term)

Antiband (C-term)

Antiband (C-term)

Antiband (C-term): Phashe (ST)

H

I

J

K

K

K

K

K

K

K

K

K

K

K

K

K

K

K

K

K

K

K

K







|     |       |       |          |            |                            |           |           |           |         |          |          |                            |                                           |   |
|-----|-------|-------|----------|------------|----------------------------|-----------|-----------|-----------|---------|----------|----------|----------------------------|-------------------------------------------|---|
| CD  | 2, 3  | 3     | g1813327 | g1812954   | prepro biocentral TOF-bata | 441.9139  | 3         | 1322.7194 | 0.0005  | 72       | 0.00052  | R                          | AALFQLEAARL                               | H |
| CD  |       |       | g1813327 | g1812954   | prepro biocentral TOF-bata | 1047.0700 | 4         | 4184.2341 | 0.0188  | 55       | 0.049    | R                          | QLSARPPALHLRLSPDDQQLAEISSARPOLEL          | H |
| CD  |       |       | g1813327 | g1812954   | prepro biocentral TOF-bata | 653.3077  | 2         | 1304.9997 | 0.0013  | 54       | 0.041    | L                          | AEASRAFPQRE                               | L |
| ETD | 2     | 3     | g1813327 | g1812954   | prepro biocentral TOF-bata | 540.2744  | 3         | 1617.7998 | 0.0014  | 80       | 0.00018  | A                          | LSLAEASRAFPQRE                            | L |
| CD  | 2     | 3     | g1813327 | g1812954   | prepro biocentral TOF-bata | 809.9092  | 2         | 1617.7998 | 0.0040  | 67       | 0.0031   | A                          | LSLAEASRAFPQRE                            | L |
| ETD | 3     | 3,4   | g1813327 | g1812954   | prepro biocentral TOF-bata | 469.7511  | 4         | 1874.9751 | 0.0000  | 99       | 2.00E-08 | L                          | FRLEPTAARSWVTRP                           | L |
| CD  | 3     | 3,4   | g1813327 | g1812954   | prepro biocentral TOF-bata | 625.9993  | 3         | 1874.9751 | 0.0009  | 68       | 0.0026   | L                          | FRLEPTAARSWVTRP                           | L |
| CD  | 3     | 3,4   | g1813327 | g1812954   | prepro biocentral TOF-bata | 687.3729  | 3         | 2059.0963 | 0.0007  | 57       | 0.029    | R                          | ALFRLPTAARSWVTRP                          | L |
| ETD | 3     | 3,4   | g1813327 | g1812954   | prepro biocentral TOF-bata | 515.7821  | 4         | 2059.0963 | 0.0001  | 100      | 1.30E-06 | R                          | ALFRLPTAARSWVTRP                          | L |
| ETD |       |       | g1813327 | g1812954   | prepro biocentral TOF-bata | 573.2355  | 4         | 2290.0726 | 0.0002  | 98       | 2.10E-06 | A                          | BRASFPPELHSEDORFPEL                       | L |
| CD  |       |       | g1813327 | g1812954   | prepro biocentral TOF-bata | 577.8397  | 4         | 2304.9893 | 0.0011  | 84       | 5.40E-06 | A                          | BRASFPPELHSEDORFPEL                       | L |
| ETD |       |       | g1813327 | g1812954   | prepro biocentral TOF-bata | 544.9009  | 4         | 2375.2501 | 0.0015  | 79       | 0.00021  | L                          | ACASRAFPPELHSEDORFPEL                     | L |
| CD  |       |       | g1813327 | g1812954   | prepro biocentral TOF-bata | 987.4867  | 3         | 2689.4000 | 0.0054  | 61       | 1.30E-05 | R                          | QLSARPPALHLRLSPDDQQLAEISSARPOLEL          | L |
| CD  |       |       | g1813327 | g1812954   | prepro biocentral TOF-bata | 955.1808  | 3         | 2902.5140 | 0.0067  | 108      | 2.00E-07 | R                          | QLSARPPALHLRLSPDDQQLAEISSARPOLEL          | L |
| ETD | 4,5   | 4     | g1813327 | g1812954   | prepro biocentral TOF-bata | 719.6550  | 4         | 2874.3896 | 0.0012  | 54       | 8.90E-06 | A                          | LSLAEASRAFPQRELHSEDORFPEL                 | L |
| CD  | 4,5   | 4     | g1813327 | g1812954   | prepro biocentral TOF-bata | 719.6553  | 4         | 2874.3896 | 0.0024  | 166      | 5.60E-13 | A                          | LSLAEASRAFPQRELHSEDORFPEL                 | L |
| ETD | 3,4,5 | 3,4,5 | g1813327 | g1812954   | prepro biocentral TOF-bata | 578.6884  | 5         | 2888.4053 | 0.0006  | 99       | 2.60E-06 | A                          | LSLAEASRAFPQRELHSEDORFPEL                 | L |
| ETD | 3,4,5 | 3,4,5 | g1813327 | g1812954   | prepro biocentral TOF-bata | 578.6887  | 5         | 2888.4053 | 0.0017  | 123      | 1.10E-08 | A                          | LSLAEASRAFPQRELHSEDORFPEL                 | L |
| CD  |       |       | g1813327 | g1812954   | prepro biocentral TOF-bata | 938.5161  | 5         | 4687.5310 | 0.0131  | 67       | 0.0026   | R                          | QLSARPPALHLRLSPDDQQLAEISSARPOLELHRP       | O |
| CD  |       |       | g1813327 | g1812954   | prepro biocentral TOF-bata | 603.2179  | 2         | 1204.6200 | 0.0011  | 63       | 0.0053   | L                          | PEGLFEAARLH                               | R |
| CD  |       |       | g1813327 | g1812954   | prepro biocentral TOF-bata | 416.2389  | 3         | 1245.6942 | 0.0005  | 73       | 0.00043  | R                          | LGGDGLHRIS                                | R |
| ETD | 3     | 3     | g1813327 | g1812954   | prepro biocentral TOF-bata | 416.2389  | 3         | 1245.6942 | 0.0007  | 86       | 2.20E-05 | R                          | LGGDGLHRIS                                | R |
| CD  |       |       | g1813327 | g1812954   | prepro biocentral TOF-bata | 440.2407  | 3         | 1317.7041 | -0.0036 | 86       | 3.00E-05 | A                          | LFQLEAARLH                                | R |
| ETD | 3     | 3     | g1813327 | g1812954   | prepro biocentral TOF-bata | 440.2418  | 3         | 1317.7041 | -0.0004 | 72       | 0.00069  | A                          | LFQLEAARLH                                | R |
| ETD |       |       | g1812954 | g1812954   | prepro biocentral TOF-bata | 463.5886  | 3         | 1387.8844 | -0.0003 | 76       | 0.00032  | E                          | LHSEDORFPEL                               | R |
| CD  | 3     | 3     | g1813327 | g1812954   | prepro biocentral TOF-bata | 463.5809  | 3         | 1387.7028 | -0.0001 | 72       | 0.00075  | P                          | TARSWVTRP                                 | R |
| ETD | 3     | 3     | g1813327 | g1812954   | prepro biocentral TOF-bata | 463.5810  | 3         | 1387.7028 | 0.0004  | 55       | 0.037    | P                          | TARSWVTRP                                 | R |
| ETD |       |       | g1813327 | g1812954   | prepro biocentral TOF-bata | 468.2405  | 3         | 1401.7001 | -0.0005 | 75       | 0.00048  | E                          | LHSEDORFPEL                               | R |
| ETD |       |       | g1813327 | g1812954   | prepro biocentral TOF-bata | 487.5996  | 3         | 1489.7703 | -0.0011 | 60       | 0.00072  | R                          | AALFQLEAARLH                              | R |
| CD  |       |       | g1813327 | g1812954   | prepro biocentral TOF-bata | 748.4020  | 2         | 1486.8483 | 0.0001  | 73       | 0.00046  | R                          | QLSARPPALHLRLSPDDQQLAEISSARPOLEL          | L |
| ETD |       |       | g1813327 | g1812954   | prepro biocentral TOF-bata | 524.9421  | 3         | 1571.8956 | -0.0010 | 61       | 0.00019  | L                          | PTAARSWVTRP                               | R |
| ETD |       |       | g1813327 | g1812954   | prepro biocentral TOF-bata | 535.5304  | 3         | 1603.7580 | -0.0008 | 70       | 0.0019   | P                          | LHSEDORFPEL                               | R |
| ETD |       |       | g1813327 | g1812954   | prepro biocentral TOF-bata | 405.4509  | 4         | 1617.7747 | 0.0000  | 71       | 0.0013   | P                          | SELHTEORFPEL                              | R |
| ETD |       |       | g1813327 | g1812954   | prepro biocentral TOF-bata | 541.6151  | 3         | 1621.8213 | 0.0021  | 76       | 0.00006  | L                          | FRLEPTAARSWVTRP                           | R |
| ETD |       |       | g1813327 | g1812954   | prepro biocentral TOF-bata | 425.4971  | 4         | 1697.9577 | 0.0014  | 88       | 1.10E-06 | R                          | LTRVLEGGDGLHRIS                           | R |
| ETD |       |       | g1813327 | g1812954   | prepro biocentral TOF-bata | 602.9882  | 3         | 1805.9404 | 0.0004  | 61       | 0.011    | R                          | ALFRLPTAARSWVTRP                          | R |
| ETD | 3     | 3     | g1813327 | g1812954   | prepro biocentral TOF-bata | 614.6704  | 3         | 1840.9008 | -0.0014 | 93       | 6.30E-06 | F                          | RLSPTAARSWVTRP                            | R |
| CD  | 3     | 3     | g1813327 | g1812954   | prepro biocentral TOF-bata | 614.6715  | 3         | 1840.9008 | 0.0019  | 61       | 0.0095   | F                          | RLSPTAARSWVTRP                            | R |
| ETD | 3     | 3,4   | g1813327 | g1812954   | prepro biocentral TOF-bata | 498.0220  | 4         | 1988.0592 | -0.0001 | 108      | 2.00E-07 | L                          | FRLEPTAARSWVTRP                           | R |
| CD  | 3     | 3,4   | g1813327 | g1812954   | prepro biocentral TOF-bata | 663.6940  | 3         | 1988.0592 | 0.0009  | 74       | 0.00063  | L                          | FRLEPTAARSWVTRP                           | R |
| ETD |       |       | g1812954 | g1812954   | prepro biocentral TOF-bata | 502.2386  | 4         | 2004.9090 | -0.0036 | 69       | 0.0013   | A                          | BRASFPPELHSEDORF                          | R |
| CD  | 3     | 3,4   | g1813327 | g1812954   | prepro biocentral TOF-bata | 673.9889  | 3         | 2018.9446 | 0.0002  | 59       | 0.016    | A                          | BRASFPPELHSEDORF                          | R |
| ETD | 3     | 3,4   | g1813327 | g1812954   | prepro biocentral TOF-bata | 673.9893  | 3         | 2018.9446 | 0.0015  | 97       | 3.10E-06 | A                          | BRASFPPELHSEDORF                          | R |
| CD  | 4     | 4     | g1813327 | g1812954   | prepro biocentral TOF-bata | 514.9508  | 4         | 2054.1749 | -0.0007 | 54       | 0.019    | R                          | LTRVLEGGDGLHRIS                           | R |
| ETD | 3     | 3,4   | g1813327 | g1812954   | prepro biocentral TOF-bata | 514.9513  | 4         | 2054.1749 | 0.0011  | 100      | 4.90E-07 | R                          | LTRVLEGGDGLHRIS                           | R |
| ETD | 3     | 3,4   | g1813327 | g1812954   | prepro biocentral TOF-bata | 526.2902  | 4         | 2101.1433 | 0.0006  | 96       | 2.90E-06 | A                          | FRLEPTAARSWVTRP                           | R |
| CD  | 3     | 3,4   | g1813327 | g1812954   | prepro biocentral TOF-bata | 701.3890  | 3         | 2101.1433 | 0.0020  | 62       | 0.0076   | A                          | FRLEPTAARSWVTRP                           | R |
| ETD |       |       | g1812954 | g1812954   | prepro biocentral TOF-bata | 701.9146  | 3         | 2160.9796 | -0.0019 | 66       | 0.006    | R                          | BRASFPPELHSEDORFPEL                       | R |
| ETD |       |       | g1812954 | g1812954   | prepro biocentral TOF-bata | 544.0026  | 4         | 2172.1804 | 0.0004  | 110      | 1.30E-07 | R                          | ALFRLPTAARSWVTRP                          | R |
| ETD | 3     | 3,4   | g1813327 | g1812954   | prepro biocentral TOF-bata | 725.0487  | 3         | 2172.1804 | 0.0038  | 71       | 0.00083  | R                          | ALFRLPTAARSWVTRP                          | R |
| ETD |       |       | g1813327 | g1812954   | prepro biocentral TOF-bata | 544.172   | 4         | 2174.0202 | 0.0003  | 136      | 4.20E-10 | R                          | ASSPPELHSEDORFPEL                         | R |
| CD  |       |       | g1812954 | g1812954   | prepro biocentral TOF-bata | 570.1188  | 4         | 2276.9458 | 0.0003  | 62       | 0.0078   | L                          | AEASRAFPQRELHSEDORF                       | R |
| CD  |       |       | g1812954 | g1812954   | prepro biocentral TOF-bata | 763.0390  | 3         | 2296.0794 | 0.0007  | 79       | 0.00021  | A                          | LSLAEASRAFPQRELHSEDORFPEL                 | R |
| ETD |       |       | g1813327 | g1812954   | prepro biocentral TOF-bata | 573.5224  | 4         | 2290.0814 | -0.0010 | 119      | 1.60E-08 | L                          | AEASRAFPQRELHSEDORF                       | R |
| ETD |       |       | g1813327 | g1812954   | prepro biocentral TOF-bata | 767.7057  | 3         | 2300.0920 | 0.0031  | 113      | 8.70E-08 | A                          | LSLAEASRAFPQRELHSEDORFPEL                 | R |
| CD  | 4     | 4     | g1812954 | g1812954   | prepro biocentral TOF-bata | 601.7963  | 4         | 2403.1567 | -0.0004 | 77       | 0.00037  | A                          | BRASFPPELHSEDORFPEL                       | R |
| ETD | 4     | 4     | g1812954 | g1812954   | prepro biocentral TOF-bata | 601.7965  | 4         | 2403.1567 | 0.0000  | 158      | 3.00E-12 | A                          | BRASFPPELHSEDORFPEL                       | R |
| ETD | 3,4   | 3,4,5 | g1813327 | g1812954   | prepro biocentral TOF-bata | 605.2992  | 4         | 2417.1724 | -0.0045 | 148      | 3.40E-11 | A                          | BRASFPPELHSEDORFPEL                       | R |
| CD  | 3,4   | 3,4,5 | g1813327 | g1812954   | prepro biocentral TOF-bata | 605.3005  | 4         | 2417.1724 | 0.0005  | 78       | 0.0003   | A                          | BRASFPPELHSEDORFPEL                       | R |
| ETD |       |       | g1813327 | g1812954   | prepro biocentral TOF-bata | 823.9514  | 4         | 2490.1775 | -0.0010 | 117      | 3.10E-08 | L                          | SLAEASRAFPQRELHSEDORF                     | R |
| ETD | 3,4   | 4     | g1812954 | g1812954   | prepro biocentral TOF-bata | 648.3195  | 4         | 2589.2459 | 0.0029  | 157      | 8.00E-12 | A                          | LSLAEASRAFPQRELHSEDORF                    | R |
| CD  | 3,4   | 4     | g1812954 | g1812954   | prepro biocentral TOF-bata | 864.0003  | 3         | 2589.2459 | 0.0031  | 141      | 1.70E-10 | A                          | LSLAEASRAFPQRELHSEDORF                    | R |
| ETD | 3,4   | 3,4   | g1813327 | g1812954   | prepro biocentral TOF-bata | 651.8237  | 4         | 2603.2616 | 0.0043  | 178      | 2.90E-14 | A                          | LSLAEASRAFPQRELHSEDORF                    | R |
| CD  | 3,4   | 3,4   | g1813327 | g1812954   | prepro biocentral TOF-bata | 868.7627  | 3         | 2603.2616 | 0.0047  | 131      | 1.60E-09 | A                          | LSLAEASRAFPQRELHSEDORF                    | R |
| ETD |       |       | g1813327 | g1812954   | prepro biocentral TOF-bata | 655.3005  | 4         | 2617.2521 | 0.0008  | 71       | 0.0014   | A                          | EAASRAFPQRELHSEDORFPEL                    | R |
| ETD |       |       | g1812954 | g1812954   | prepro biocentral TOF-bata | 669.5755  | 4         | 2674.2735 | -0.0000 | 142      | 1.10E-10 | L                          | AEASRAFPQRELHSEDORFPEL                    | R |
| ETD | 4     | 4     | g1813327 | g1812954   | prepro biocentral TOF-bata | 670.9796  | 4         | 2686.9992 | 0.0000  | 138      | 3.10E-10 | L                          | ACASRAFPQRELHSEDORFPEL                    | R |
| CD  | 4     | 4     | g1813327 | g1812954   | prepro biocentral TOF-bata | 670.9803  | 4         | 2686.9992 | 0.0001  | 119      | 2.40E-08 | L                          | ACASRAFPQRELHSEDORFPEL                    | R |
| ETD | 3,4,5 | 3,4,5 | g1812954 | g1812954   | prepro biocentral TOF-bata | 588.5025  | 5         | 2987.4737 | 0.0026  | 182      | 1.10E-14 | A                          | LSLAEASRAFPQRELHSEDORFPEL                 | R |
| ETD | 3,4,5 | 3,4,5 | g1812954 | g1812954   | prepro biocentral TOF-bata | 747.790   | 4         | 2987.4737 | 0.0082  | 134      | 1.00E-09 | A                          | LSLAEASRAFPQRELHSEDORFPEL                 | R |
| CD  | 3,4   | 3,4,5 | g1813327 | g1812954   | prepro biocentral TOF-bata | 751.3786  | 4         | 3001.4893 | -0.0042 | 56       | 6.10E-06 | A                          | LSLAEASRAFPQRELHSEDORFPEL                 | R |
| ETD | 3,4   | 3,4,5 | g1813327 | g1812954   | prepro biocentral TOF-bata | 601.3054  | 5         | 3001.4893 | 0.0014  | 190      | 2.70E-15 | A                          | LSLAEASRAFPQRELHSEDORFPEL                 | R |
| ETD | 4     | 4     | g1813327 | g1812954   | prepro biocentral TOF-bata | 831.6907  | 4         | 3322.7269 | 0.0087  | 151      | 1.90E-11 | R                          | LSPDDQQLAEISSARPOLELHRPQAA                | R |
| CD  | 4     | 4     | g1813327 | g1812954   | prepro biocentral TOF-bata | 831.6914  | 4         | 3322.7269 | 0.0097  | 90       | 2.20E-05 | R                          | LSPDDQQLAEISSARPOLELHRPQAA                | R |
| CD  | 5,6   | 5,6   | g1813327 | g1812954   | prepro biocentral TOF-bata | 827.2833  | 6         | 4957.6638 | -0.0075 | 181      | 1.40E-14 | R                          | QLSARPPALHLRLSPDDQQLAEISSARPOLELHRPQAA    | R |
| ETD | 5,6   | 5,6   | g1813327 | g1812954   | prepro biocentral TOF-bata | 827.2841  | 6         | 4957.6638 | -0.0030 | 220      | 1.90E-18 | R                          | QLSARPPALHLRLSPDDQQLAEISSARPOLELHRPQAA    | R |
| ETD |       |       | g1812954 | g1812954   | prepro biocentral TOF-bata | 761.9967  | 7         | 5326.8875 | 0.0315  | 119      | 6.70E-07 | R                          | QLSARPPALHLRLSPDDQQLAEISSARPOLELHRPQAAHRP | R |
| CD  |       |       | g1812954 | g1812954   | prepro biocentral TOF-bata | 1039.5705 | 3         | 3115.6778 | 0.0119  | 98       | 2.10E-06 | R                          | QLSARPPALHLRLSPDDQQLAEISSARPOLELHRPQAA    | S |
| ETD |       |       | g1812954 | g1812954   | prepro biocentral TOF-bata | 536.2828  | 3         | 1605.8263 | 0.0002  | 84       | 5.50E-05 | R                          | ALFRLPTAARSWVTRP                          | V |
| ETD | 3,4,5 | 4     | g190412  | pro-paleth | 789.8964                   | 4         | 3155.9537 | 0.0030    | 183     | 1.30E-14 | R        | QWTLNAGLTLPHAVDNRFSKDKNLIS | X                                         |   |















|     |         |       |           |                            |           |   |            |         |     |          |   |                                                                                              |   |
|-----|---------|-------|-----------|----------------------------|-----------|---|------------|---------|-----|----------|---|----------------------------------------------------------------------------------------------|---|
| CD  | 5.6,7.8 | 6,7.8 | g11736078 | Neurosecretory protein VGF | 1104.0166 | 6 | 6618.0362  | 0.0197  | 211 | 1.00E-17 | R | DQEEIPIHRRKAGTEGQEEEDQEMPGTDLIELTKLHLPADVYVHEEVE                                             | X |
| LTD | 5.6,7.8 | 6,7.8 | g11736078 | Neurosecretory protein VGF | 146.4470  | 7 | 6618.0362  | 0.0420  | 184 | 8.6E-15  | R | DQEEIPIHRRKAGTEGQEEEDQEMPGTDLIELTKLHLPADVYVHEEVE                                             | X |
| CD  |         |       | g11736078 | Neurosecretory protein VGF | 1117.3433 | 6 | 6698.0025  | 0.0136  | 168 | 7.8E-13  | R | DQEEIPIHRRKAGTEGQEEEDQEMPGTDLIELTKLHLPADVYVHEEVE                                             | X |
| CD  |         |       | g11736078 | Neurosecretory protein VGF | 1032.4533 | 7 | 7220.1100  | 0.0121  | 68  | 0.00053  | D | EAAEEREAREEEAEEAGEGRROGSEVVEEDEAAEAAEAEAEARFARNALLAEEEDGADAD                                 | K |
| CD  | 6.7.8   | 7.8   | g11736078 | Neurosecretory protein VGF | 1204.0542 | 6 | 7618.2742  | 0.0073  | 171 | 4.8E-12  | R | GLQEAEREAREEEAEEAGEGRROGSEVVEEDEAAEAAEAEAEARFARNALLAEEEDGADAD                                | K |
| LTD | 6.7.8   | 7.8   | g11736078 | Neurosecretory protein VGF | 140.7962  | 8 | 7618.2742  | 0.0372  | 106 | 1.50E-05 | R | GLQEAEREAREEEAEEAGEGRROGSEVVEEDEAAEAAEAEAEARFARNALLAEEEDGADAD                                | K |
| CD  |         |       | g11736078 | Neurosecretory protein VGF | 1137.9435 | 7 | 7958.5237  | 0.0298  | 110 | 6.60E-08 | R | GLQGRQLQEAEREAREEEAEEAGEGRROGSEVVEEDEAAEAAEAEAEARFARNALLAEEEDGADAD                           | K |
| CD  |         |       | g11736078 | Neurosecretory protein VGF | 1236.5805 | 9 | 11201.1818 | -0.0271 | 57  | 0.036    | R | QAAAGEERLADLADLLQYLQGGARGRGLQGRQLQEAEREAREEEAEEAGEGRROGSEVVEEDEAAEAAEAEAEARFARNALLAEEEDGADAD | K |
| CD  |         |       | g11736078 | Neurosecretory protein VGF | 771.2708  | 2 | 1540.7230  | 0.0041  | 59  | 0.016    | R | QEAATRAAAAGEER                                                                               | L |
| CD  |         |       | g11736078 | Neurosecretory protein VGF | 808.8779  | 2 | 1655.7387  | 0.0026  | 56  | 0.019    | R | QGETAAAEITETHT                                                                               | L |
| CD  |         |       | g11736078 | Neurosecretory protein VGF | 863.2356  | 3 | 1986.8019  | 0.0031  | 64  | 3.82E-05 | R | NSPQDEELFGVDFPRAL                                                                            | L |
| LTD | 2       | 3     | g11736078 | Neurosecretory protein VGF | 923.6652  | 3 | 2018.0020  | 0.0021  | 70  | 0.0017   | A | ANGSERLADLADLLQYL                                                                            | L |
| CD  | 2       | 3     | g11736078 | Neurosecretory protein VGF | 1010.0250 | 2 | 2018.0020  | 0.0035  | 67  | 0.0034   | A | ANGSERLADLADLLQYL                                                                            | L |
| LTD | 3       | 3     | g11736078 | Neurosecretory protein VGF | 981.3455  | 3 | 2041.0116  | 0.0032  | 104 | 7.00E-07 | R | RLQGESELENYHVL                                                                               | L |
| CD  | 3       | 3     | g11736078 | Neurosecretory protein VGF | 981.3467  | 3 | 2041.0116  | 0.0068  | 107 | 3.60E-07 | R | RLQGESELENYHVL                                                                               | L |
| CD  | 3       | 3     | g11736078 | Neurosecretory protein VGF | 747.3674  | 3 | 2239.0829  | -0.0025 | 97  | 3.20E-06 | R | QGETAAAEITETHTLTRYN                                                                          | L |
| LTD | 3       | 3     | g11736078 | Neurosecretory protein VGF | 747.3677  | 3 | 2239.0829  | -0.0018 | 98  | 2.60E-06 | R | QGETAAAEITETHTLTRYN                                                                          | L |
| CD  |         |       | g11736078 | Neurosecretory protein VGF | 791.1098  | 3 | 2370.3019  | 0.0056  | 83  | 4.30E-05 | R | LADLADLLQYLQGGARGRG                                                                          | L |
| CD  |         |       | g11736078 | Neurosecretory protein VGF | 1227.1229 | 2 | 2452.2193  | 0.0119  | 84  | 9.40E-05 | R | QEAATRAAAAGEERLADLADLL                                                                       | L |
| LTD |         |       | g11736078 | Neurosecretory protein VGF | 819.0766  | 3 | 2454.2027  | 0.0055  | 81  | 0.0015   | R | NSPQDEELFGVDFPRALAAVLL                                                                       | L |
| CD  |         |       | g11736078 | Neurosecretory protein VGF | 823.1386  | 3 | 2766.3824  | 0.0115  | 81  | 0.0019   | R | NSPQDEELFGVDFPRALAAVLLGA                                                                     | L |
| CD  |         |       | g11736078 | Neurosecretory protein VGF | 990.8466  | 3 | 2969.5094  | 0.0088  | 117 | 4.70E-08 | R | QEAATRAAAAGEERLADLADLLQYL                                                                    | L |
| LTD | 3.4     | 4     | g11736078 | Neurosecretory protein VGF | 764.6425  | 4 | 3054.6210  | -0.0002 | 68  | 0.0027   | A | ANGSERLADLADLLQYLQGGARGRG                                                                    | L |
| CD  | 3.4     | 4     | g11736078 | Neurosecretory protein VGF | 764.6444  | 4 | 3054.6210  | 0.0077  | 169 | 2.40E-13 | A | ANGSERLADLADLLQYLQGGARGRG                                                                    | L |
| LTD | 4       | 4     | g11736078 | Neurosecretory protein VGF | 798.8833  | 4 | 3183.4955  | 0.0084  | 135 | 5.10E-10 | R | AGEAAEERLQGESELENYHVL                                                                        | L |
| CD  | 4       | 4     | g11736078 | Neurosecretory protein VGF | 798.8845  | 4 | 3183.4955  | 0.0134  | 114 | 7.60E-08 | R | AGEAAEERLQGESELENYHVL                                                                        | L |
| LTD |         |       | g11736078 | Neurosecretory protein VGF | 895.9073  | 4 | 3339.5966  | 0.0034  | 88  | 3.50E-05 | R | RAGEAAEERLQGESELENYHVL                                                                       | L |
| LTD | 3.4     | 4     | g11736078 | Neurosecretory protein VGF | 868.8749  | 4 | 3343.8771  | 0.0029  | 167 | 1.20E-13 | R | DQEEVVEEDEAAEAAEAEAEARFARNAL                                                                 | L |
| CD  | 3.4     | 4     | g11736078 | Neurosecretory protein VGF | 1116.8895 | 3 | 3343.8771  | 0.0091  | 118 | 1.50E-14 | R | DQEEVVEEDEAAEAAEAEAEARFARNAL                                                                 | L |
| CD  | 4       | 4     | g11736078 | Neurosecretory protein VGF | 367.4137  | 4 | 3345.6202  | 0.0031  | 73  | 4.20E-05 | R | DQEEIPIHRRKAGTEGQEEEDQEMPGTDS                                                                | L |
| LTD | 4       | 4     | g11736078 | Neurosecretory protein VGF | 367.4138  | 4 | 3345.6202  | 0.0059  | 69  | 0.017    | R | DQEEIPIHRRKAGTEGQEEEDQEMPGTDS                                                                | L |
| CD  |         |       | g11736078 | Neurosecretory protein VGF | 904.1568  | 5 | 4515.9386  | 0.0063  | 64  | 0.00099  | R | EEEAAGEGRROGSEVVEEDEAAEAAEAEAEARFARNAL                                                       | L |
| CD  |         |       | g11736078 | Neurosecretory protein VGF | 827.5357  | 6 | 4599.1493  | 0.0093  | 76  | 9.00E-05 | R | ESAAEEREAGEGRROGSEVVEEDEAAEAAEAEAEARFARNAL                                                   | L |
| CD  |         |       | g11736078 | Neurosecretory protein VGF | 846.3909  | 6 | 5072.2334  | 0.0084  | 122 | 2.80E-09 | R | ESAAEEREAGEGRROGSEVVEEDEAAEAAEAEAEARFARNAL                                                   | L |
| LTD | 5.6,7   | 6,7   | g11736078 | Neurosecretory protein VGF | 849.9525  | 7 | 5942.6195  | 0.0021  | 99  | 5.10E-07 | R | GLQEAEREAREEEAEEAGEGRROGSEVVEEDEAAEAAEAEAEARFARNAL                                           | L |
| CD  | 5.6,7   | 6,7   | g11736078 | Neurosecretory protein VGF | 991.4449  | 6 | 5942.6195  | 0.0094  | 124 | 1.70E-09 | R | GLQEAEREAREEEAEEAGEGRROGSEVVEEDEAAEAAEAEAEARFARNAL                                           | L |
| CD  | 5.6,7   | 6,7   | g11736078 | Neurosecretory protein VGF | 1010.2915 | 6 | 6055.7006  | 0.0048  | 129 | 7.40E-10 | R | GLQEAEREAREEEAEEAGEGRROGSEVVEEDEAAEAAEAEAEARFARNAL                                           | L |
| LTD | 5.6,7   | 6,7   | g11736078 | Neurosecretory protein VGF | 1010.2923 | 6 | 6055.7006  | 0.0066  | 107 | 1.20E-07 | R | GLQEAEREAREEEAEEAGEGRROGSEVVEEDEAAEAAEAEAEARFARNAL                                           | L |
| CD  | 6       | 6     | g11736078 | Neurosecretory protein VGF | 1066.1955 | 6 | 6391.1191  | 0.0102  | 96  | 9.30E-06 | R | SPQPPPPAFAPARDELQWNLVFPWDEEDEVYPPGPIFFPNVRRRLTQPPA                                           | L |
| CD  | 6       | 6     | g11736078 | Neurosecretory protein VGF | 1066.1960 | 6 | 6391.1191  | 0.0132  | 106 | 9.80E-07 | R | SPQPPPPAFAPARDELQWNLVFPWDEEDEVYPPGPIFFPNVRRRLTQPPA                                           | L |
| CD  | 3       | 3     | g11736078 | Neurosecretory protein VGF | 709.3636  | 3 | 2125.0400  | -0.0009 | 64  | 0.0066   | R | QGETAAAEITETHTLTRYN                                                                          | N |
| LTD | 3       | 3     | g11736078 | Neurosecretory protein VGF | 709.3541  | 3 | 2125.0400  | 0.0004  | 80  | 0.00016  | R | QGETAAAEITETHTLTRYN                                                                          | N |
| LTD | 4       | 4     | g11736078 | Neurosecretory protein VGF | 762.3337  | 4 | 3045.3030  | 0.0025  | 161 | 3.00E-13 | R | DQEEVVEEDEAAEAAEAEAEARFARNAL                                                                 | N |
| CD  | 4       | 4     | g11736078 | Neurosecretory protein VGF | 762.3345  | 4 | 3045.3030  | 0.0058  | 104 | 1.40E-07 | R | DQEEVVEEDEAAEAAEAEAEARFARNAL                                                                 | N |
| LTD | 5       | 6     | g11736078 | Neurosecretory protein VGF | 685.5222  | 6 | 4107.0886  | 0.0007  | 60  | 0.027    | A | APPQPPAAGPPLSSEIKKPYVADGAVPQPKQGGAPFVBDAR                                                    | N |
| CD  | 5       | 6     | g11736078 | Neurosecretory protein VGF | 822.4255  | 5 | 4107.0886  | 0.0024  | 107 | 5.90E-07 | A | APPQPPAAGPPLSSEIKKPYVADGAVPQPKQGGAPFVBDAR                                                    | N |
| LTD | 4.5     | 4     | g11736078 | Neurosecretory protein VGF | 1225.3377 | 4 | 4897.3089  | 0.0128  | 76  | 0.00057  | R | SPQPPPPAFAPARDELQWNLVFPWDEEDEVYPPGPIFFPNVRRRLTQPPA                                           | N |
| CD  | 4       | 4     | g11736078 | Neurosecretory protein VGF | 1225.3378 | 4 | 4897.3089  | 0.0150  | 116 | 2.10E-07 | R | SPQPPPPAFAPARDELQWNLVFPWDEEDEVYPPGPIFFPNVRRRLTQPPA                                           | N |
| LTD | 6       | 6     | g11736078 | Neurosecretory protein VGF | 963.9999  | 6 | 5767.5386  | 0.0192  | 135 | 1.70E-08 | R | GLQEAEREAREEEAEEAGEGRROGSEVVEEDEAAEAAEAEAEARFARNAL                                           | N |
| CD  | 6       | 6     | g11736078 | Neurosecretory protein VGF | 963.9999  | 6 | 5767.5386  | 0.0198  | 137 | 1.20E-07 | R | GLQEAEREAREEEAEEAGEGRROGSEVVEEDEAAEAAEAEAEARFARNAL                                           | N |
| CD  |         |       | g11736078 | Neurosecretory protein VGF | 817.9006  | 3 | 2568.2416  | 0.0083  | 91  | 1.60E-06 | R | QGETAAAEITETHTLTRYNLES                                                                       | P |
| LTD | 4.5     | 4     | g11736078 | Neurosecretory protein VGF | 827.0874  | 4 | 3304.3181  | 0.0022  | 126 | 9.00E-10 | R | DQEEIPIHRRKAGTEGQEEEDQEMD                                                                    | P |
| CD  | 4.5     | 4     | g11736078 | Neurosecretory protein VGF | 827.0879  | 4 | 3304.3181  | 0.0046  | 72  | 4.80E-06 | R | DQEEIPIHRRKAGTEGQEEEDQEMD                                                                    | P |
| CD  | 6       | 6     | g11736078 | Neurosecretory protein VGF | 1023.6747 | 6 | 6135.9972  | 0.0073  | 91  | 2.70E-05 | R | SPQPPPPAFAPARDELQWNLVFPWDEEDEVYPPGPIFFPNVRRRLTQPPA                                           | P |
| LTD | 6       | 6     | g11736078 | Neurosecretory protein VGF | 1023.6753 | 6 | 6135.9972  | 0.0109  | 106 | 1.00E-06 | R | SPQPPPPAFAPARDELQWNLVFPWDEEDEVYPPGPIFFPNVRRRLTQPPA                                           | P |
| CD  |         |       | g11736078 | Neurosecretory protein VGF | 585.6522  | 3 | 1753.9322  | 0.0025  | 64  | 0.0047   | R | RPEALLQSSAEAGE                                                                               | O |
| CD  | 4.5     |       | g11736078 | Neurosecretory protein VGF | 507.0039  | 4 | 2023.9877  | -0.0013 | 63  | 0.0088   | R | HYHMLPPIRRPVDREA                                                                             | O |
| LTD | 3       | 3     | g11736078 | Neurosecretory protein VGF | 721.3209  | 3 | 2160.9406  | 0.0003  | 85  | 2.00E-05 | R | GLQEAEREAREEEAEAE                                                                            | O |
| CD  | 3       | 3     | g11736078 | Neurosecretory protein VGF | 721.3221  | 3 | 2160.9406  | 0.0040  | 96  | 1.50E-06 | R | GLQEAEREAREEEAEAE                                                                            | O |
| LTD | 2       | 3     | g11736078 | Neurosecretory protein VGF | 856.7702  | 3 | 2567.2867  | 0.0021  | 76  | 0.00053  | R | NSPQDEELFGVDFPRALAAVLL                                                                       | O |
| CD  | 2       | 3     | g11736078 | Neurosecretory protein VGF | 1284.6555 | 2 | 2567.2867  | 0.0097  | 70  | 0.0021   | R | NSPQDEELFGVDFPRALAAVLL                                                                       | O |
| CD  |         |       | g11736078 | Neurosecretory protein VGF | 879.1186  | 3 | 2634.2043  | -0.0003 | 100 | 2.10E-06 | R | ASWDEFGARVERPLPAPPQDF                                                                        | O |
| LTD | 4       | 4     | g11736078 | Neurosecretory protein VGF | 793.3184  | 4 | 2917.2445  | -0.0002 | 144 | 1.50E-11 | R | DQEEVVEEDEAAEAAEAEAEARFARNAL                                                                 | O |
| CD  | 4       | 4     | g11736078 | Neurosecretory protein VGF | 793.3194  | 4 | 2917.2445  | 0.0039  | 53  | 0.018    | R | DQEEVVEEDEAAEAAEAEAEARFARNAL                                                                 | O |
| CD  |         |       | g11736078 | Neurosecretory protein VGF | 845.6171  | 5 | 4223.0420  | 0.0070  | 80  | 0.00026  | R | QGETAAAEITETHTLTRYNLESPPRQPRVRRASWDF                                                         | O |
| CD  | 6,7     |       | g11736078 | Neurosecretory protein VGF | 939.2949  | 6 | 5929.4779  | 0.0079  | 159 | 6.50E-11 | R | GLQEAEREAREEEAEEAGEGRROGSEVVEEDEAAEAAEAEAEARFARNAL                                           | O |
| CD  |         |       | g11736078 | Neurosecretory protein VGF | 868.1124  | 7 | 6499.7575  | 0.0061  | 72  | 0.00041  | R | GLQGRQLQEAEREAREEEAEEAGEGRROGSEVVEEDEAAEAAEAEAEARFARNAL                                      | O |
| CD  |         |       | g11736078 | Neurosecretory protein VGF | 145.2033  | 2 | 1385.9395  | 0.0005  | 71  | 0.0006   | R | GLQEAEREAREEEAEEAGEGRROGSEVVEEDEAAEAAEAEAEARFARNAL                                           | O |
| CD  |         |       | g11736078 | Neurosecretory protein VGF | 453.3149  | 2 | 1304.6149  | 0.0002  | 76  | 0.00034  | A | SWDEFGARVPE                                                                                  | R |
| CD  |         |       | g11736078 | Neurosecretory protein VGF | 686.9197  | 2 | 1371.6630  | 0.0018  | 70  | 0.0013   | R | RPEALLQSSAEAGE                                                                               | R |
| LTD |         |       | g11736078 | Neurosecretory protein VGF | 503.2666  | 3 | 1506.7791  | -0.0011 | 79  | 0.00018  | D | AVPQPKQGGAPFVBDAR                                                                            | R |
| CD  |         |       | g11736078 | Neurosecretory protein VGF | 816.4444  | 2 | 1631.8794  | -0.0041 | 61  | 0.012    | P | PEPYPVPPAAPPVTHV                                                                             | R |
| CD  |         |       | g11736078 | Neurosecretory protein VGF | 417.9581  | 4 | 1667.8099  | -0.0036 | 71  | 0.001    | R | HYHMLPPIRRPVDREA                                                                             | R |
| LTD |         |       | g11736078 | Neurosecretory protein VGF | 573.3175  | 3 | 1728.9311  | -0.0004 | 54  | 0.054    | A | PEPYPVPPAAPPVTHV                                                                             | R |
| LTD | 3       | 3     | g11736078 | Neurosecretory protein VGF | 586.6251  | 3 | 1756.8519  | 0.0015  | 91  | 1.20E-05 | O | EQEELNTEHYLL                                                                                 | R |
| CD  | 3       | 3     | g11736078 | Neurosecretory protein VGF | 586.6255  | 3 | 1756.8519  | 0.0028  | 60  | 0.013    | O | EQEELNTEHYLL                                                                                 | R |
| CD  | 3       | 3     | g11736078 | Neurosecretory protein VGF | 596.3076  | 3 | 1785.9023  | -0.0012 | 60  | 0.019    | H | HALPPIRRPVDREA                                                                               | R |
| LTD | 3       | 3     | g11736078 | Neurosecretory protein VGF | 596.3082  | 3 | 1785.9023  | 0.0004  | 55  | 0.052    | H | HALPPIRRPVDREA                                                                               | R |
| LTD |         |       | g11736078 | Neurosecretory protein VGF | 600.9969  | 3 | 1799.9682  | 0.0008  | 57  | 0.025    | N | APPYPPVPPAAPPVTHV                                                                            | R |
| LTD | 2       | 3     | g11736078 | Neurosecretory protein VGF | 601.3244  | 3 | 1800.9623  | -0.0008 | 63  | 0.0065   | R | VPERALPVPAPQDFGA                                                                             | R |

|     |       |       |           |                            |           |   |           |         |     |          |   |                                     |   |
|-----|-------|-------|-----------|----------------------------|-----------|---|-----------|---------|-----|----------|---|-------------------------------------|---|
| CD  | 2     | 3     | g11736078 | Neurosecretory protein VGF | 901.4841  | 2 | 1800.9023 | 0.0015  | 83  | 6.30E-05 | R | VPERALPPPPAFQGA                     | R |
| CD  |       |       | g11736078 | Neurosecretory protein VGF | 935.9438  | 2 | 1869.8705 | 0.0026  | 57  | 0.024    | R | QGETAAETERTHTLT                     | R |
| CD  | 2.3   | 3     | g11736078 | Neurosecretory protein VGF | 634.0281  | 3 | 1899.0618 | 0.0007  | 103 | 3.80E-07 | E | ALAPLSKATGVAAFFPKA                  | R |
| ETD | 2.3   | 3     | g11736078 | Neurosecretory protein VGF | 634.0286  | 3 | 1899.0618 | 0.0023  | 75  | 0.00026  | E | ALAPLSKATGVAAFFPKA                  | R |
| CD  |       |       | g11736078 | Neurosecretory protein VGF | 958.0148  | 2 | 1914.0112 | 0.0040  | 69  | 0.0018   | K | NAPPEVPPPPAAFAFTHV                  | R |
| ETD |       |       | g11736078 | Neurosecretory protein VGF | 481.7457  | 4 | 1922.9612 | -0.0074 | 87  | 3.50E-05 | Y | HALPSPRRYPPREAGA                    | R |
| CD  | 4     | 3.4   | g11736078 | Neurosecretory protein VGF | 925.5122  | 4 | 2086.0245 | -0.0047 | 76  | 0.00048  | H | YHHALPSPRRYPPREAGA                  | R |
| ETD | 4     | 3.4   | g11736078 | Neurosecretory protein VGF | 925.5134  | 4 | 2086.0245 | -0.0001 | 119 | 2.20E-08 | H | YHHALPSPRRYPPREAGA                  | R |
| CD  | 3     | 3.4   | g11736078 | Neurosecretory protein VGF | 923.7787  | 4 | 2091.0861 | -0.0004 | 121 | 1.40E-08 | R | THLTVNLESPPERVW                     | R |
| CD  | 3     | 3.4   | g11736078 | Neurosecretory protein VGF | 998.0367  | 3 | 2091.0861 | 0.0022  | 80  | 0.00016  | R | THLTVNLESPPERVW                     | R |
| ETD | 2     | 3     | g11736078 | Neurosecretory protein VGF | 718.8397  | 3 | 2154.8956 | 0.0017  | 123 | 8.90E-09 | R | RLGSEELNVEYHLL                      | R |
| CD  | 2     | 3     | g11736078 | Neurosecretory protein VGF | 1078.9092 | 2 | 2164.8956 | 0.0084  | 72  | 0.0012   | R | RLGSEELNVEYHLL                      | R |
| CD  |       |       | g11736078 | Neurosecretory protein VGF | 1081.9800 | 2 | 2161.9633 | 0.0082  | 58  | 0.013    | R | ESEVYPPSPYHPTNTH                    | R |
| ETD | 2.3.4 | 3.4   | g11736078 | Neurosecretory protein VGF | 543.5571  | 4 | 2170.2011 | -0.0016 | 82  | 6.90E-05 | R | KNAPPEVPPPPAAFAFTHV                 | R |
| CD  | 2.3.4 | 3.4   | g11736078 | Neurosecretory protein VGF | 1086.1104 | 2 | 2170.2011 | 0.0052  | 107 | 1.90E-07 | R | KNAPPEVPPPPAAFAFTHV                 | R |
| ETD | 2.3.4 | 3.4.5 | g11736078 | Neurosecretory protein VGF | 556.7766  | 4 | 2223.0834 | -0.0042 | 138 | 2.80E-09 | R | HYHALPSPRRYPPREAGA                  | R |
| CD  | 2.3.4 | 3.4.5 | g11736078 | Neurosecretory protein VGF | 556.7782  | 4 | 2223.0834 | 0.0001  | 92  | 1.20E-05 | R | HYHALPSPRRYPPREAGA                  | R |
| ETD | 2.3.4 | 3.4.5 | g11736078 | Neurosecretory protein VGF | 584.3223  | 4 | 2333.2617 | -0.0015 | 92  | 8.90E-06 | R | TLOPPSALRRRHYPHALLPSP               | R |
| ETD |       |       | g11736078 | Neurosecretory protein VGF | 588.0661  | 4 | 2348.2349 | 0.0005  | 122 | 1.20E-08 | E | TRHHTLTVNLESPPERVW                  | R |
| CD  | 4.5   |       | g11736078 | Neurosecretory protein VGF | 595.8037  | 4 | 2379.1845 | 0.0011  | 72  | 0.0013   | R | RHYHALPSPRRYPPREAGA                 | R |
| CD  | 2.3   | 3     | g11736078 | Neurosecretory protein VGF | 807.0221  | 3 | 2418.0418 | 0.0026  | 91  | 3.60E-06 | R | GLGAEERESAREEEEAEGE                 | R |
| ETD | 2.3   | 3     | g11736078 | Neurosecretory protein VGF | 807.0228  | 3 | 2418.0418 | 0.0048  | 68  | 0.00078  | R | GLGAEERESAREEEEAEGE                 | R |
| ETD |       |       | g11736078 | Neurosecretory protein VGF | 644.5432  | 4 | 2574.1429 | 0.0008  | 116 | 1.70E-08 | R | GLGAEERESAREEEEAEGE                 | R |
| CD  |       |       | g11736078 | Neurosecretory protein VGF | 868.8180  | 3 | 2597.4239 | 0.0032  | 98  | 1.40E-06 | R | LADLADLLOLGGARQRLOG                 | R |
| CD  |       |       | g11736078 | Neurosecretory protein VGF | 896.4223  | 3 | 2686.2452 | -0.0001 | 58  | 0.022    | W | DREDEVYPPSPYHPTNTHP                 | R |
| ETD | 3     | 3     | g11736078 | Neurosecretory protein VGF | 921.3910  | 3 | 2761.1434 | 0.0079  | 93  | 1.10E-06 | R | QGEVYVEDEEAALAEAEAEARA              | R |
| CD  | 3     | 3     | g11736078 | Neurosecretory protein VGF | 921.3912  | 3 | 2761.1434 | 0.0084  | 101 | 1.70E-07 | R | QGEVYVEDEEAALAEAEAEARA              | R |
| ETD | 4     | 4     | g11736078 | Neurosecretory protein VGF | 895.6085  | 4 | 2778.4048 | 0.0000  | 146 | 7.30E-11 | A | AETETRTHTLTVNLESPPERVW              | R |
| CD  | 4     | 4     | g11736078 | Neurosecretory protein VGF | 895.6093  | 4 | 2778.4048 | 0.0002  | 68  | 0.0003   | A | AETETRTHTLTVNLESPPERVW              | R |
| ETD | 3     | 4     | g11736078 | Neurosecretory protein VGF | 709.8860  | 4 | 2833.4030 | 0.0002  | 97  | 4.20E-06 | R | ASWSEFGAHYPERALPPPPAFQGA            | R |
| CD  | 3     | 4     | g11736078 | Neurosecretory protein VGF | 945.4710  | 3 | 2833.4030 | 0.0001  | 119 | 2.60E-09 | R | ASWSEFGAHYPERALPPPPAFQGA            | R |
| CD  |       |       | g11736078 | Neurosecretory protein VGF | 9481.819  | 3 | 2841.4884 | 0.0015  | 98  | 2.60E-06 | A | AGSEERLADLADLLOLGGARQ               | R |
| ETD | 3     | 4     | g11736078 | Neurosecretory protein VGF | 715.9801  | 4 | 2858.2914 | -0.0001 | 127 | 1.90E-09 | R | RLGQRQLGAEERESAREEEEAEGE            | R |
| CD  | 3     | 4     | g11736078 | Neurosecretory protein VGF | 953.7786  | 3 | 2858.2914 | 0.0077  | 133 | 5.80E-10 | R | RLGQRQLGAEERESAREEEEAEGE            | R |
| CD  |       |       | g11736078 | Neurosecretory protein VGF | 971.8542  | 3 | 2912.9395 | 0.0053  | 78  | 0.00029  | Q | AAAGEERLADLADLLOLGGARQ              | R |
| ETD |       | 4.5.6 | g11736078 | Neurosecretory protein VGF | 989.7169  | 5 | 2943.9590 | -0.0112 | 97  | 3.60E-06 | R | TLOPPSALRRRHYPHALLPSP               | R |
| CD  | 3     | 4     | g11736078 | Neurosecretory protein VGF | 883.8122  | 3 | 2948.4112 | 0.0038  | 138 | 3.50E-10 | R | QGETAAETERTHTLTVNLESPPE             | R |
| ETD | 3     | 4     | g11736078 | Neurosecretory protein VGF | 738.1111  | 4 | 2948.4112 | 0.0041  | 112 | 1.20E-07 | R | QGETAAETERTHTLTVNLESPPE             | R |
| ETD |       |       | g11736078 | Neurosecretory protein VGF | 741.8240  | 4 | 2962.4872 | -0.0004 | 122 | 1.40E-08 | E | ADPPLSEKPEPVADAVPPKQDSAPFV          | R |
| CD  |       |       | g11736078 | Neurosecretory protein VGF | 999.1744  | 3 | 2994.4934 | 0.0078  | 118 | 3.50E-08 | R | NSEPPSEELFGDYPRALAAVLGALD           | R |
| ETD |       |       | g11736078 | Neurosecretory protein VGF | 756.3895  | 4 | 3021.5108 | 0.0020  | 140 | 2.50E-10 | E | TAETETRTHTLTVNLESPPERVW             | R |
| ETD | 3.4   | 4     | g11736078 | Neurosecretory protein VGF | 756.9010  | 4 | 3023.5876 | 0.0073  | 98  | 3.00E-06 | R | GAAGEERLADLADLLOLGGARQ              | R |
| CD  | 3.4   | 4     | g11736078 | Neurosecretory protein VGF | 756.9010  | 4 | 3023.5876 | 0.0075  | 171 | 1.80E-13 | R | GAAGEERLADLADLLOLGGARQ              | R |
| CD  |       |       | g11736078 | Neurosecretory protein VGF | 1014.5400 | 3 | 3040.5941 | 0.0041  | 56  | 0.05     | R | GAAGEERLADLADLLOLGGARQ              | R |
| ETD | 3.4.5 | 4     | g11736078 | Neurosecretory protein VGF | 776.6017  | 4 | 3102.3721 | 0.0057  | 123 | 3.60E-09 | R | GLGAEERESAREEEEAEGE                 | R |
| CD  | 4     | 4     | g11736078 | Neurosecretory protein VGF | 1035.1340 | 3 | 3102.3721 | 0.0081  | 93  | 3.20E-08 | R | GLGAEERESAREEEEAEGE                 | R |
| ETD | 4     | 4     | g11736078 | Neurosecretory protein VGF | 786.6206  | 4 | 3142.4511 | 0.0024  | 61  | 0.012    | R | DRGLDQRLGAEERESAREEEEAEGE           | R |
| ETD | 3     | 4     | g11736078 | Neurosecretory protein VGF | 796.6911  | 4 | 3142.4511 | 0.0041  | 96  | 4.00E-06 | R | DRGLDQRLGAEERESAREEEEAEGE           | R |
| CD  | 3     | 4     | g11736078 | Neurosecretory protein VGF | 825.1534  | 4 | 3295.5796 | 0.0048  | 160 | 2.20E-10 | R | AGEAEAEERLQGELENYEHVLL              | R |
| CD  |       |       | g11736078 | Neurosecretory protein VGF | 1099.8896 | 3 | 3295.5796 | 0.0011  | 112 | 1.50E-07 | R | AGEAEAEERLQGELENYEHVLL              | R |
| ETD | 3.4   | 3.4   | g11736078 | Neurosecretory protein VGF | 848.4268  | 4 | 3389.8600 | 0.0053  | 153 | 1.30E-11 | R | QGETAAETERTHTLTVNLESPPERVW          | R |
| ETD | 3.4   | 3.4   | g11736078 | Neurosecretory protein VGF | 848.4268  | 4 | 3389.8600 | 0.0057  | 206 | 8.80E-17 | R | QGETAAETERTHTLTVNLESPPERVW          | R |
| CD  |       |       | g11736078 | Neurosecretory protein VGF | 1132.9235 | 3 | 3395.7521 | 0.0186  | 184 | 1.10E-14 | R | GAETRGAAGEERLADLADLLOLGGARQ         | R |
| CD  | 3.4   | 4     | g11736078 | Neurosecretory protein VGF | 864.1781  | 4 | 3452.4807 | 0.0027  | 121 | 1.80E-08 | R | RAGEAEAEERLQGELENYEHVLL             | R |
| ETD | 3.4   | 4     | g11736078 | Neurosecretory protein VGF | 864.1784  | 4 | 3452.4807 | 0.0036  | 83  | 0.00014  | R | RAGEAEAEERLQGELENYEHVLL             | R |
| CD  | 3.4   | 4     | g11736078 | Neurosecretory protein VGF | 866.9614  | 4 | 3483.8171 | -0.0008 | 178 | 3.70E-14 | R | GAAGEERLADLADLLOLGGARQRLOG          | R |
| ETD | 3.4   | 4     | g11736078 | Neurosecretory protein VGF | 866.9626  | 4 | 3483.8171 | 0.0040  | 86  | 5.20E-05 | R | GAAGEERLADLADLLOLGGARQRLOG          | R |
| ETD |       |       | g11736078 | Neurosecretory protein VGF | 700.7572  | 5 | 3498.7379 | 0.0118  | 98  | 3.80E-06 | P | PPRPEADPPLSEKPEPVADAVPPKQDSAPFV     | R |
| ETD |       |       | g11736078 | Neurosecretory protein VGF | 700.7739  | 5 | 3498.8358 | -0.0026 | 149 | 2.70E-11 | R | TLOPPSALRRRHYPHALLPSP               | R |
| CD  | 5     | 4.5.6 | g11736078 | Neurosecretory protein VGF | 700.7750  | 5 | 3498.8358 | 0.0028  | 109 | 2.70E-07 | R | TLOPPSALRRRHYPHALLPSP               | R |
| ETD | 5     | 4.5.6 | g11736078 | Neurosecretory protein VGF | 705.3408  | 5 | 3521.6885 | -0.0008 | 171 | 1.50E-13 | R | HYHALPSPRRYPPREAGARAEAEAE           | R |
| CD  |       |       | g11736078 | Neurosecretory protein VGF | 887.8692  | 4 | 3547.8455 | 0.0024  | 94  | 8.80E-06 | R | RPEELLOSSEASERLLQGLAQVEADRRGAEAT    | R |
| ETD | 3     | 4.5   | g11736078 | Neurosecretory protein VGF | 724.3732  | 3 | 3666.8278 | 0.0021  | 137 | 5.20E-10 | A | APPRPEADPPLSEKPEPVADAVPPKQDSAPFV    | R |
| CD  | 3     | 4.5   | g11736078 | Neurosecretory protein VGF | 1223.2861 | 3 | 3666.8278 | 0.0087  | 99  | 3.50E-06 | A | APPRPEADPPLSEKPEPVADAVPPKQDSAPFV    | R |
| CD  | 3.4   | 4     | g11736078 | Neurosecretory protein VGF | 1227.6402 | 3 | 3679.8917 | 0.0070  | 177 | 5.10E-14 | R | GAETRGAAGEERLADLADLLOLGGARQ         | R |
| ETD | 3.4   | 4     | g11736078 | Neurosecretory protein VGF | 909.9820  | 4 | 3679.8917 | 0.0071  | 96  | 5.90E-05 | R | GAETRGAAGEERLADLADLLOLGGARQ         | R |
| ETD |       |       | g11736078 | Neurosecretory protein VGF | 745.6208  | 5 | 3704.7198 | 0.0007  | 100 | 3.20E-06 | L | LOGGARQRLOGRLGAEERESAREEEEAEGE      | R |
| ETD |       |       | g11736078 | Neurosecretory protein VGF | 207.3569  | 4 | 3746.2441 | 0.0045  | 91  | 2.30E-05 | A | APPRPEADPPLSEKPEPVADAVPPKQDSAPFV    | R |
| ETD |       |       | g11736078 | Neurosecretory protein VGF | 780.4094  | 5 | 3897.0007 | 0.0087  | 70  | 0.0008   | R | ALALVLDALDPPRPPARSSQDSPEEAALLETYV   | R |
| CD  | 4.5.6 | 4.5.6 | g11736078 | Neurosecretory protein VGF | 988.7556  | 4 | 3950.9876 | 0.0060  | 146 | 8.20E-13 | A | APPRPEADPPLSEKPEPVADAVPPKQDSAPFV    | R |
| ETD | 4.5.6 | 4.5.6 | g11736078 | Neurosecretory protein VGF | 791.2662  | 5 | 3950.9876 | 0.0070  | 257 | 6.00E-02 | A | APPRPEADPPLSEKPEPVADAVPPKQDSAPFV    | R |
| ETD |       |       | g11736078 | Neurosecretory protein VGF | 801.1913  | 5 | 4000.9222 | -0.0019 | 111 | 1.90E-07 | Q | YLLDQGARQRLOGRLGAEERESAREEEEAEGE    | R |
| CD  | 5     | 5     | g11736078 | Neurosecretory protein VGF | 801.1918  | 5 | 4000.9222 | 0.0003  | 78  | 0.00036  | Q | YLLDQGARQRLOGRLGAEERESAREEEEAEGE    | R |
| ETD |       |       | g11736078 | Neurosecretory protein VGF | 807.1966  | 5 | 4030.9638 | 0.0073  | 115 | 9.20E-08 | A | APPRPEADPPLSEKPEPVADAVPPKQDSAPFV    | R |
| CD  | 4.5   | 4.5   | g11736078 | Neurosecretory protein VGF | 1031.0401 | 4 | 4120.1413 | 0.0020  | 161 | 2.00E-12 | R | GAETRGAAGEERLADLADLLOLGGARQRLOG     | R |
| ETD | 4.5   | 4.5   | g11736078 | Neurosecretory protein VGF | 825.0363  | 5 | 4120.1413 | 0.0038  | 132 | 1.50E-09 | R | GAETRGAAGEERLADLADLLOLGGARQRLOG     | R |
| CD  |       |       | g11736078 | Neurosecretory protein VGF | 1038.5488 | 4 | 4150.1546 | 0.0115  | 90  | 2.50E-05 | D | PRALAAVLDALDPPRPPARSSQDSPEEAALLETYV | R |
| CD  |       |       | g11736078 | Neurosecretory protein VGF | 1070.2557 | 4 | 4276.9807 | 0.0130  | 84  | 6.30E-05 | R | DELFDWNLVPPDREDEVYPPSPYHPTNTHP      | R |
| CD  | 5     | 4.5   | g11736078 | Neurosecretory protein VGF | 885.4343  | 5 | 4422.1377 | -0.0028 | 98  | 4.50E-06 | R | QGETAAETERTHTLTVNLESPPERVW          | R |
| ETD | 5     | 4.5   | g11736078 | Neurosecretory protein VGF | 885.4364  | 5 | 4422.1377 | 0.0079  | 151 | 2.20E-11 | R | QGETAAETERTHTLTVNLESPPERVW          | R |

Glycoprotein (O-linked)

Phospho (ST)

Glycoprotein (O-linked)

Glycoprotein (O-linked)

Glycoprotein (O-linked)

Glycoprotein (O-linked)

Glycoprotein (O-linked)

Glycoprotein (O-linked)



|     |         |             |           |                            |          |    |           |         |     |          |   |                                                                   |   |
|-----|---------|-------------|-----------|----------------------------|----------|----|-----------|---------|-----|----------|---|-------------------------------------------------------------------|---|
| LTD | 5,6,7   | 6           | g11736078 | Neurosecretory protein VGF | 7702877  | 6  | 4614.3681 | 0.0045  | 196 | 7.00E-16 | R | MPSGSLPETHKFGVSPKTHLGEALAPLRLKAYGVAAAPPKA                         | R |
| CD  | 5,6,7   | 6           | g11736078 | Neurosecretory protein VGF | 9238827  | 5  | 4614.3681 | 0.0193  | 191 | 2.30E-15 | R | MPSGSLPETHKFGVSPKTHLGEALAPLRLKAYGVAAAPPKA                         | R |
| LTD |         |             | g11736078 | Neurosecretory protein VGF | 8053773  | 6  | 4797.4208 | -0.0006 | 107 | 7.00E-07 | R | TLQPSALRRHHALPPSRHFGDGAARRAGEAEAE                                 | R |
| CD  |         |             | g11736078 | Neurosecretory protein VGF | 9791294  | 5  | 4890.4972 | 0.0134  | 85  | 9.70E-05 | R | GAAGAEEADLADLADLDTLLDGGARGLDGRGLGEAEERESA                         | R |
| LTD | 5,6     | 6           | g11736078 | Neurosecretory protein VGF | 8182423  | 6  | 4903.4026 | 0.0075  | 121 | 2.40E-08 | R | QGETAAETEIRTHLTVNLESPQPERVWRASWDFGARVPE                           | R |
| CD  | 5,6     | 6           | g11736078 | Neurosecretory protein VGF | 9816898  | 5  | 4903.4026 | 0.0098  | 95  | 1.00E-05 | R | QGETAAETEIRTHLTVNLESPQPERVWRASWDFGARVPE                           | R |
| CD  | 4,5     |             | g11736078 | Neurosecretory protein VGF | 9878369  | 5  | 4934.1357 | 0.0123  | 149 | 4.30E-12 | R | QGEERVEEEDAEAEAEAEAEARQNALFAEEDDEADGAK                            | R |
| CD  |         |             | g11736078 | Neurosecretory protein VGF | 12726088 | 4  | 5086.3878 | 0.0182  | 78  | 0.00034  | P | QPPPPAFARDELQWNEVLPFWOREEDEVYPPGFHFFNYR                           | R |
| CD  | 5       | 5           | g11736078 | Neurosecretory protein VGF | 10217314 | 5  | 5103.6085 | 0.0121  | 127 | 7.30E-09 | R | QAEATROAAAGEERLADLADLDTLLDGGARGLDGRGLGEAE                         | R |
| LTD | 5       | 5           | g11736078 | Neurosecretory protein VGF | 10217319 | 5  | 5103.6085 | 0.0140  | 140 | 3.40E-10 | R | QAEATROAAAGEERLADLADLDTLLDGGARGLDGRGLGEAE                         | R |
| CD  | 5,6     | 5           | g11736078 | Neurosecretory protein VGF | 11052381 | 5  | 5145.2086 | 0.0150  | 99  | 2.80E-07 | R | QLGEAEERESAREEEAGEERROEERVEEEDAEAEAEAEAE                          | R |
| CD  | 5,6     | 5           | g11736078 | Neurosecretory protein VGF | 10684106 | 5  | 5287.4002 | 0.0174  | 119 | 3.00E-08 | R | IQPPPPAFARDELQWNEVLPFWOREEDEVYPPGFHFFNYR                          | R |
| LTD | 5,6     | 5           | g11736078 | Neurosecretory protein VGF | 10684107 | 5  | 5287.4002 | 0.0179  | 137 | 4.80E-16 | R | IQPPPPAFARDELQWNEVLPFWOREEDEVYPPGFHFFNYR                          | R |
| CD  | 5,6     | 6           | g11736078 | Neurosecretory protein VGF | 10954943 | 5  | 5473.3768 | 0.0083  | 74  | 7.00E-05 | R | QLGEAEERESAREEEAGEERROEERVEEEDAEAEAEAEAE                          | R |
| LTD | 5,6     | 6           | g11736078 | Neurosecretory protein VGF | 913288   | 6  | 5473.3768 | 0.0126  | 154 | 1.30E-12 | R | QLGEAEERESAREEEAGEERROEERVEEEDAEAEAEAEAE                          | R |
| CD  | 5,6,7   | 5,6         | g11736078 | Neurosecretory protein VGF | 11091404 | 5  | 5540.6530 | 0.0126  | 136 | 7.40E-10 | R | IQPPPPAFARDELQWNEVLPFWOREEDEVYPPGFHFFNYR                          | R |
| LTD | 5,6,7   | 5,6         | g11736078 | Neurosecretory protein VGF | 11091409 | 5  | 5540.6530 | 0.0151  | 112 | 2.00E-07 | R | IQPPPPAFARDELQWNEVLPFWOREEDEVYPPGFHFFNYR                          | R |
| LTD | 6       | 6           | g11736078 | Neurosecretory protein VGF | 9254790  | 6  | 5546.8213 | 0.0089  | 74  | 0.0014   | R | QAEATROAAAGEERLADLADLDTLLDGGARGLDGRGLGEAEERESA                    | R |
| CD  | 6       | 6           | g11736078 | Neurosecretory protein VGF | 9254798  | 6  | 5546.8213 | 0.0139  | 146 | 8.90E-11 | R | QAEATROAAAGEERLADLADLDTLLDGGARGLDGRGLGEAEERESA                    | R |
| CD  | 5,6     | 5           | g11736078 | Neurosecretory protein VGF | 9688177  | 6  | 5794.8449 | 0.0174  | 104 | 1.40E-06 | R | NSEPDQELFGDVPRLAAVLLDGLDRPAPFAPSSGQDPEEAEALLTETV                  | R |
| LTD | 5,6     | 5           | g11736078 | Neurosecretory protein VGF | 11593799 | 5  | 5794.8449 | 0.0182  | 72  | 0.0025   | R | NSEPDQELFGDVPRLAAVLLDGLDRPAPFAPSSGQDPEEAEALLTETV                  | R |
| CD  | 5,6,7   |             | g11736078 | Neurosecretory protein VGF | 12049997 | 5  | 6019.9495 | 0.0126  | 121 | 8.10E-08 | R | GAAGAEEADLADLADLDTLLDGGARGLDGRGLGEAEERESAREEEAE                   | R |
| CD  | 5,6     |             | g11736078 | Neurosecretory protein VGF | 1238100  | 5  | 6187.9922 | 0.0215  | 118 | 5.20E-08 | R | AAPAFTHVSPQPPAFARDELQWNEVLPFWOREEDEVYPPGFHFFNYR                   | R |
| CD  |         |             | g11736078 | Neurosecretory protein VGF | 10850423 | 6  | 6504.2032 | 0.0049  | 80  | 0.00043  | R | IQPPPPAFARDELQWNEVLPFWOREEDEVYPPGFHFFNYR                          | R |
| CD  | 6,7,8   | 7,8         | g11736078 | Neurosecretory protein VGF | 10932424 | 6  | 6553.4009 | 0.0099  | 195 | 1.20E-15 | R | VPERALPPAFPSFGGARMQDGLPETHKFGVSPKTHLGEALAPLRLKAYGVAAAPPKA         | R |
| LTD | 6,7,8   | 7,8         | g11736078 | Neurosecretory protein VGF | 8201837  | 8  | 6553.4009 | 0.0108  | 164 | 3.30E-12 | R | VPERALPPAFPSFGGARMQDGLPETHKFGVSPKTHLGEALAPLRLKAYGVAAAPPKA         | R |
| LTD | 6,7,8   | 7           | g11736078 | Neurosecretory protein VGF | 9547618  | 7  | 6676.2737 | 0.0084  | 106 | 1.10E-06 | R | QAEATROAAAGEERLADLADLDTLLDGGARGLDGRGLGEAEERESAREEEAGE             | R |
| CD  | 6,7,8   | 7           | g11736078 | Neurosecretory protein VGF | 11737217 | 6  | 6676.2737 | 0.0129  | 136 | 1.00E-09 | R | QAEATROAAAGEERLADLADLDTLLDGGARGLDGRGLGEAEERESAREEEAGE             | R |
| CD  | 5,6     | 7           | g11736078 | Neurosecretory protein VGF | 11753885 | 6  | 6746.1912 | 0.0061  | 95  | 4.80E-06 | R | SGEITPQRHRRKAGEEAGEEEDDEMDPTDLSLTKHLKADVYVREVEEK                  | R |
| CD  | 5,6     | 7           | g11736078 | Neurosecretory protein VGF | 14683234 | 6  | 7339.8039 | -0.0033 | 83  | 0.00319  | K | NAPPEFPPRRAAFATFHVRSQPPPPAFARDELQWNEVLPFWOREEDEVYPPGFHFFNYR       | R |
| LTD | 5,6     | 7           | g11736078 | Neurosecretory protein VGF | 14683235 | 7  | 7339.8039 | 0.0127  | 65  | 0.013    | K | NAPPEFPPRRAAFATFHVRSQPPPPAFARDELQWNEVLPFWOREEDEVYPPGFHFFNYR       | R |
| CD  | 7,8     |             | g11736078 | Neurosecretory protein VGF | 10847063 | 7  | 7685.8786 | 0.0146  | 217 | 9.70E-18 | R | AQWEGFARVPERALPPAFPSFGGARMQDGLPETHKFGVSPKTHLGEALAPLRLKAYGVAAAPPKA | R |
| CD  | 6,7,8   | 6           | g11736078 | Neurosecretory protein VGF | 1266489  | 6  | 7692.7548 | 0.0150  | 123 | 2.50E-08 | K | NAPPEFPPRRAAFATFHVRSQPPPPAFARDELQWNEVLPFWOREEDEVYPPGFHFFNYR       | R |
| LTD | 6,7,8   | 6           | g11736078 | Neurosecretory protein VGF | 1266490  | 6  | 7692.7548 | 0.0156  | 72  | 0.0033   | K | NAPPEFPPRRAAFATFHVRSQPPPPAFARDELQWNEVLPFWOREEDEVYPPGFHFFNYR       | R |
| CD  |         |             | g11736078 | Neurosecretory protein VGF | 10933517 | 7  | 7646.3691 | 0.0148  | 104 | 2.30E-05 | R | QLGEAEERESAREEEAGEERROEERVEEEDAEAEAEAEARQNALFAEEDDEADGAK          | R |
| CD  |         |             | g11736078 | Neurosecretory protein VGF | 9921963  | 8  | 7848.9447 | 0.0071  | 75  | 0.00015  | R | KNAPPEFPPRRAAFATFHVRSQPPPPAFARDELQWNEVLPFWOREEDEVYPPGFHFFNYR      | R |
| CD  | 7,8     |             | g11736078 | Neurosecretory protein VGF | 12233390 | 7  | 8656.3049 | 0.0172  | 102 | 3.40E-06 | K | NAPPEFPPRRAAFATFHVRSQPPPPAFARDELQWNEVLPFWOREEDEVYPPGFHFFNYR       | R |
| CD  |         |             | g11736078 | Neurosecretory protein VGF | 11683378 | 8  | 9338.6189 | 0.0253  | 104 | 2.10E-06 | R | SGEITPQRHRRKAGEEAGEEEDDEMDPTDLSLTKHLKADVYVREVEEK                  | R |
| LTD |         |             | g11736078 | Neurosecretory protein VGF | 6883843  | 2  | 1374.7507 | 0.0034  | 68  | 0.0014   | E | ALASLDELDF                                                        | S |
| CD  |         |             | g11736078 | Neurosecretory protein VGF | 5183350  | 4  | 2070.1123 | -0.0013 | 59  | 0.015    | K | NAPPEFPPRRAAFATFHVRSQPPPPAFARDELQWNEVLPFWOREEDEVYPPGFHFFNYR       | R |
| CD  |         |             | g11736078 | Neurosecretory protein VGF | 7677330  | 3  | 2303.1736 | 0.0036  | 110 | 2.20E-07 | R | VPERALPPAFPSFGGARMQD                                              | S |
| LTD | 2       | 3           | g11736078 | Neurosecretory protein VGF | 7777301  | 3  | 2330.1641 | 0.0044  | 76  | 0.00047  | D | PSEELAEASLGLRDFSPS                                                | S |
| CD  | 2       | 3           | g11736078 | Neurosecretory protein VGF | 11660934 | 2  | 2330.1641 | 0.0081  | 90  | 2.00E-05 | D | PSEELAEASLGLRDFSPS                                                | S |
| CD  | 3       | 3           | g11736078 | Neurosecretory protein VGF | 8280782  | 3  | 2481.2095 | 0.0031  | 104 | 8.10E-07 | R | QGETAAETEIRTHLTVNLE                                               | S |
| LTD | 3       | 3           | g11736078 | Neurosecretory protein VGF | 8280783  | 3  | 2481.2095 | 0.0036  | 87  | 3.80E-05 | R | QGETAAETEIRTHLTVNLE                                               | S |
| CD  |         |             | g11736078 | Neurosecretory protein VGF | 9971505  | 3  | 2588.4213 | 0.0084  | 95  | 6.40E-06 | R | SGTSLFAPESPPAAPPFGPFGMCPA                                         | S |
| LTD |         |             | g11736078 | Neurosecretory protein VGF | 6377249  | 5  | 3183.5949 | -0.0068 | 61  | 0.019    | A | APPQPPFAGAPPLSSEHKPVAIDAVPKPKDQ                                   | S |
| LTD |         |             | g11736078 | Neurosecretory protein VGF | 7727299  | 6  | 3886.8887 | 0.0061  | 188 | 1.80E-19 | R | SGEITPQRHRRKAGEEAGEEEDDEMDPTDLSLTKHLKADVYVREVEEK                  | R |
| CD  |         |             | g11736078 | Neurosecretory protein VGF | 11044889 | 4  | 4413.9150 | 0.0115  | 116 | 9.70E-09 | R | SGEITPQRHRRKAGEEAGEEEDDEMDPTDLSLTKHLKADVYVREVEEK                  | R |
| CD  |         |             | g11736078 | Neurosecretory protein VGF | 12818376 | 5  | 6404.1432 | 0.0084  | 135 | 1.20E-08 | R | NSEPDQELFGDVPRLAAVLLDGLDRPAPFAPSSGQDPEEAEALLTETV                  | R |
| CD  |         |             | g11736078 | Neurosecretory protein VGF | 7783537  | 2  | 1554.6910 | 0.0019  | 44  | 0.0034   | R | QGETAAETEIRTHLTVNLE                                               | T |
| CD  |         |             | g11736078 | Neurosecretory protein VGF | 8854180  | 2  | 1768.8278 | -0.0013 | 57  | 0.022    | R | QGETAAETEIRTHLTVNLE                                               | T |
| CD  | 4       | 4           | g11736078 | Neurosecretory protein VGF | 4527396  | 4  | 1806.9318 | -0.0023 | 77  | 0.00032  | Y | PPGFHFFNYR                                                        | T |
| LTD | 4       | 4           | g11736078 | Neurosecretory protein VGF | 4527420  | 4  | 1806.9318 | 0.0069  | 55  | 0.053    | Y | PPGFHFFNYR                                                        | T |
| LTD |         |             | g11736078 | Neurosecretory protein VGF | 5002023  | 4  | 2190.0521 | -0.0002 | 111 | 1.30E-07 | R | MPSGSLPETHKFGVSPKTHLGEALAPLRLKAYGVAAAPPKA                         | T |
| LTD |         |             | g11736078 | Neurosecretory protein VGF | 5053340  | 4  | 2198.1061 | 0.0010  | 57  | 0.04     | D | EYVPPGFHFFNYR                                                     | T |
| LTD | 4       | 4           | g11736078 | Neurosecretory protein VGF | 6488121  | 4  | 2571.2182 | 0.0011  | 68  | 0.0025   | R | EDEVYPPGFHFFNYR                                                   | T |
| CD  | 4       | 4           | g11736078 | Neurosecretory protein VGF | 6488127  | 4  | 2571.2182 | 0.0035  | 65  | 0.0048   | R | EDEVYPPGFHFFNYR                                                   | T |
| LTD | 4       | 4,5         | g11736078 | Neurosecretory protein VGF | 5694764  | 5  | 2842.3463 | -0.0006 | 109 | 2.30E-07 | W | REDEDEVYPPGFHFFNYR                                                | T |
| CD  | 4       | 4,5         | g11736078 | Neurosecretory protein VGF | 7115950  | 4  | 2842.3463 | 0.0045  | 78  | 0.00007  | W | REDEDEVYPPGFHFFNYR                                                | T |
| CD  |         |             | g11736078 | Neurosecretory protein VGF | 12333057 | 3  | 3696.8846 | 0.0107  | 65  | 0.0078   | R | ALAVLLDGLDRPAPFAPSSGQDPEEAEALLTETV                                | T |
| CD  |         |             | g11736078 | Neurosecretory protein VGF | 7373785  | 5  | 3863.8485 | 0.0080  | 68  | 0.0036   | D | WNEVLPFWOREEDEVYPPGFHFFNYR                                        | T |
| CD  |         |             | g11736078 | Neurosecretory protein VGF | 9184855  | 5  | 4589.1829 | 0.0081  | 60  | 0.024    | A | RDELQWNEVLPFWOREEDEVYPPGFHFFNYR                                   | T |
| CD  |         |             | g11736078 | Neurosecretory protein VGF | 11001383 | 5  | 5495.6428 | 0.0123  | 91  | 2.10E-05 | P | QPPPPAFARDELQWNEVLPFWOREEDEVYPPGFHFFNYR                           | T |
| CD  | 5,6,7,8 | 5,6,7       | g11736078 | Neurosecretory protein VGF | 11403604 | 5  | 5696.7541 | 0.0115  | 131 | 2.30E-09 | R | QPPPPAFARDELQWNEVLPFWOREEDEVYPPGFHFFNYR                           | T |
| LTD | 5,6,7,8 | 5,6,7       | g11736078 | Neurosecretory protein VGF | 9504717  | 6  | 5956.7541 | 0.0020  | 204 | 2.00E-16 | R | IQPPPPAFARDELQWNEVLPFWOREEDEVYPPGFHFFNYR                          | T |
| CD  |         |             | g11736078 | Neurosecretory protein VGF | 11050302 | 6  | 6937.3171 | 0.0101  | 68  | 0.0071   | R | ALAVLLDGLDRPAPFAPSSGQDPEEAEALLTETV                                | T |
| CD  | 6,7,8   | 7,8,9,10,11 | g11736078 | Neurosecretory protein VGF | 12024860 | 6  | 7148.8559 | 0.0165  | 94  | 2.20E-06 | K | NAPPEFPPRRAAFATFHVRSQPPPPAFARDELQWNEVLPFWOREEDEVYPPGFHFFNYR       | T |
| LTD | 6,7,8   | 7,8,9,10,11 | g11736078 | Neurosecretory protein VGF | 1758650  | 10 | 7148.8559 | 0.0210  | 108 | 8.50E-07 | K | NAPPEFPPRRAAFATFHVRSQPPPPAFARDELQWNEVLPFWOREEDEVYPPGFHFFNYR       | T |
| CD  |         |             | g11736078 | Neurosecretory protein VGF | 10015398 | 8  | 8005.0458 | 0.0152  | 122 | 3.10E-08 | R | KNAPPEFPPRRAAFATFHVRSQPPPPAFARDELQWNEVLPFWOREEDEVYPPGFHFFNYR      | T |
| CD  |         |             | g11736078 | Neurosecretory protein VGF | 7754122  | 2  | 1548.8035 | 0.0064  | 69  | 0.0018   | K | LHLKADVYVRE                                                       | V |
| LTD |         |             | g11736078 | Neurosecretory protein VGF | 6226870  | 3  | 1864.9782 | 0.0009  | 74  | 0.00059  | L | STKLKADVYVRE                                                      | V |
| CD  |         |             | g11736078 | Neurosecretory protein VGF | 7940931  | 3  | 2379.2506 | 0.0048  | 56  | 0.045    | R | RPEELADQSEASERLLDQGLAD                                            | V |
| CD  |         |             | g11736078 | Neurosecretory protein VGF | 7438453  | 4  | 2971.3430 | 0.0089  | 65  | 0.0036   | R | AQEEAEAEERLQGEELNENY                                              | V |
| CD  | 4       | 4           | g11736078 | Neurosecretory protein VGF | 7771353  | 4  | 3104.5123 | -0.0001 | 78  | 0.0004   | R | QGETAAETEIRTHLTVNLESPQPER                                         | V |
| LTD | 4       | 4           | g11736078 | Neurosecretory protein VGF | 7771356  | 4  | 3104.5123 | 0.0009  | 69  | 0.0029   | R | QGETAAETEIRTHLTVNLESPQPER                                         | V |
| LTD | 4,5     |             | g11736078 | Neurosecretory protein VGF | 7145889  | 5  | 3657.7594 | -0.0010 | 144 | 1.10E-10 | A | APPQPPFAGAPPLSSEHKPVAIDAVPKPKDQAE                                 | V |
| CD  |         |             | g11736078 | Neurosecretory protein VGF | 12669896 | 3  | 3797.9323 | 0.0147  | 62  | 0.016    | R | ALAVLLDGLDRPAPFAPSSGQDPEEAEALLTETV                                | V |
| CD  | 4       | 4           | g11736078 | Neurosecretory protein VGF | 8019006  | 4  | 3203.5807 | -0.0072 | 98  | 3.90E-06 | R | QGETAAETEIRTHLTVNLESPQPER                                         | W |
| LTD | 4       | 4           | g11736078 | Neurosecretory protein VGF | 8019026  | 4  | 3203.5807 | 0.0007  | 130 | 2.30E-09 | R | QGETAAETEIRTHLTVNLESPQPER                                         | W |

|     |   |   |   |            |                            |           |   |           |        |    |          |   |                                             |   |
|-----|---|---|---|------------|----------------------------|-----------|---|-----------|--------|----|----------|---|---------------------------------------------|---|
| CD  | * | 5 | 5 | gE17136078 | Neurosecretory protein VGF | 781.6117  | 5 | 3903.0180 | 0.0042 | 58 | 0.046    | K | NAPPEFVPPPRAAAPATHVRSQPPPPAPAFANDELDP       | W |
| STD | * | 5 | 5 | gE17136078 | Neurosecretory protein VGF | 781.6122  | 5 | 3903.0180 | 0.0064 | 75 | 0.00089  | K | NAPPEFVPPPRAAAPATHVRSQPPPPAPAFANDELDP       | W |
| STD | * | 3 | 3 | gE17136078 | Neurosecretory protein VGF | 680.0210  | 3 | 2037.0378 | 0.0034 | 76 | 0.00051  | R | GAAGAEEERLADLADLLG                          | Y |
| CD  | * | 3 | 3 | gE17136078 | Neurosecretory protein VGF | 680.0211  | 3 | 2037.0378 | 0.0038 | 67 | 0.00037  | R | GAAGAEEERLADLADLLG                          | Y |
| CD  | * |   |   | gE17136078 | Neurosecretory protein VGF | 898.7985  | 3 | 2693.3820 | 0.0118 | 95 | 7.30E-06 | R | DAEATRGAAGAEEERLADLADLLG                    | Y |
| CD  | * |   |   | gE17136078 | Neurosecretory protein VGF | 1253.8475 | 4 | 5011.3518 | 0.0091 | 74 | 0.00076  | R | SPQPPPPAPAFANDELDPWNEVLPFWRDEEDEVYPPQYHPPFN | Y |

Y Gln>Gly< (Q-H) (M-Q)

Y Gln>Gly< (Q-H) (M-Q)

Y Gln>Gly< (Q-H) (M-Q)
