# Supplementary material
Source: PubMed Central journal article supplement (PMC3591662)
Supplement: supp_M112.017400_mcp.M112.017400-6.pdf [file supp_M112.017400_mcp.M112.017400-6.pdf]

# Supplemental Figure S3

a)

NL: 5.23E7

CID\_test#2001 RT: 45.54 AV:  
1 T: FTMS + p NSI Full ms  
[400.00-1700.00]

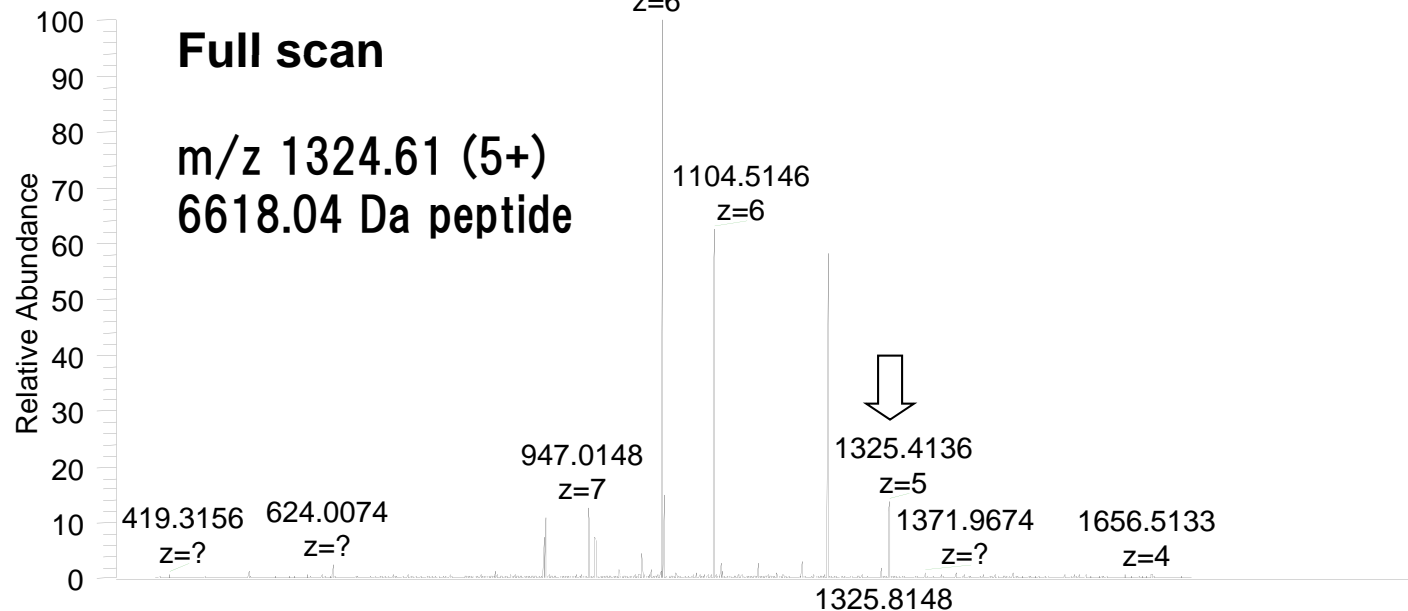

NL: 3.20E5

CID\_test#2002 RT: 45.56 AV:  
1 T: FTMS + p NSI d Full ms2  
1325.41 @cid35.00  
[350.00-2000.00]

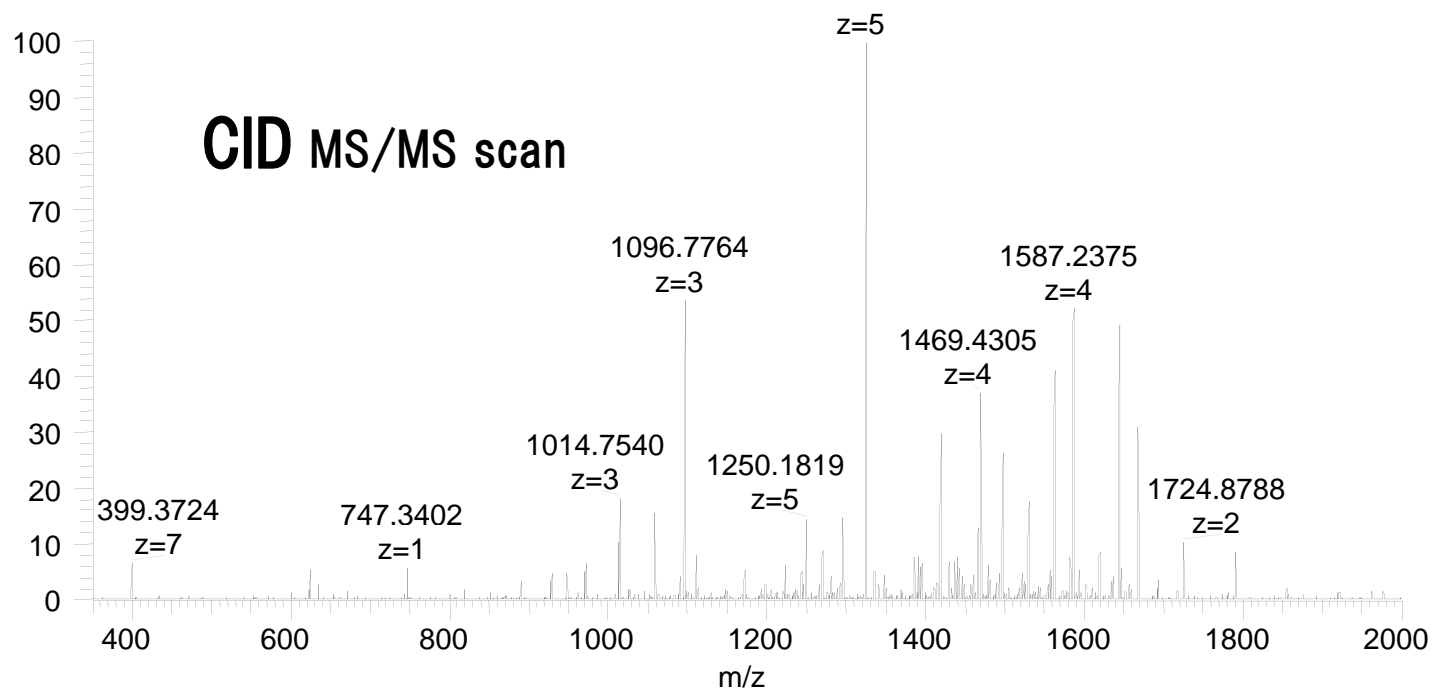

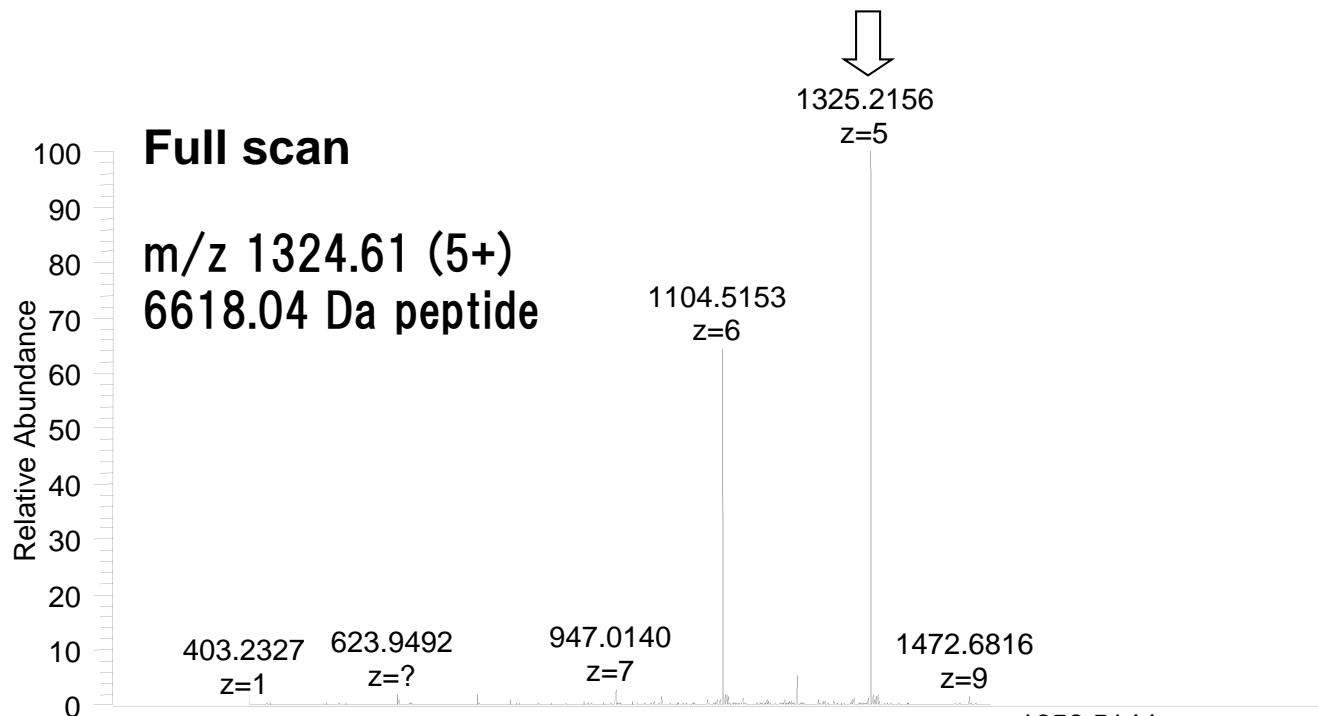

NL: 1.86E7

2000msec\_uS2#1249 RT: 50.52  
AV: 1 T: FTMS + p NSI Full ms  
[403.00-1500.00]

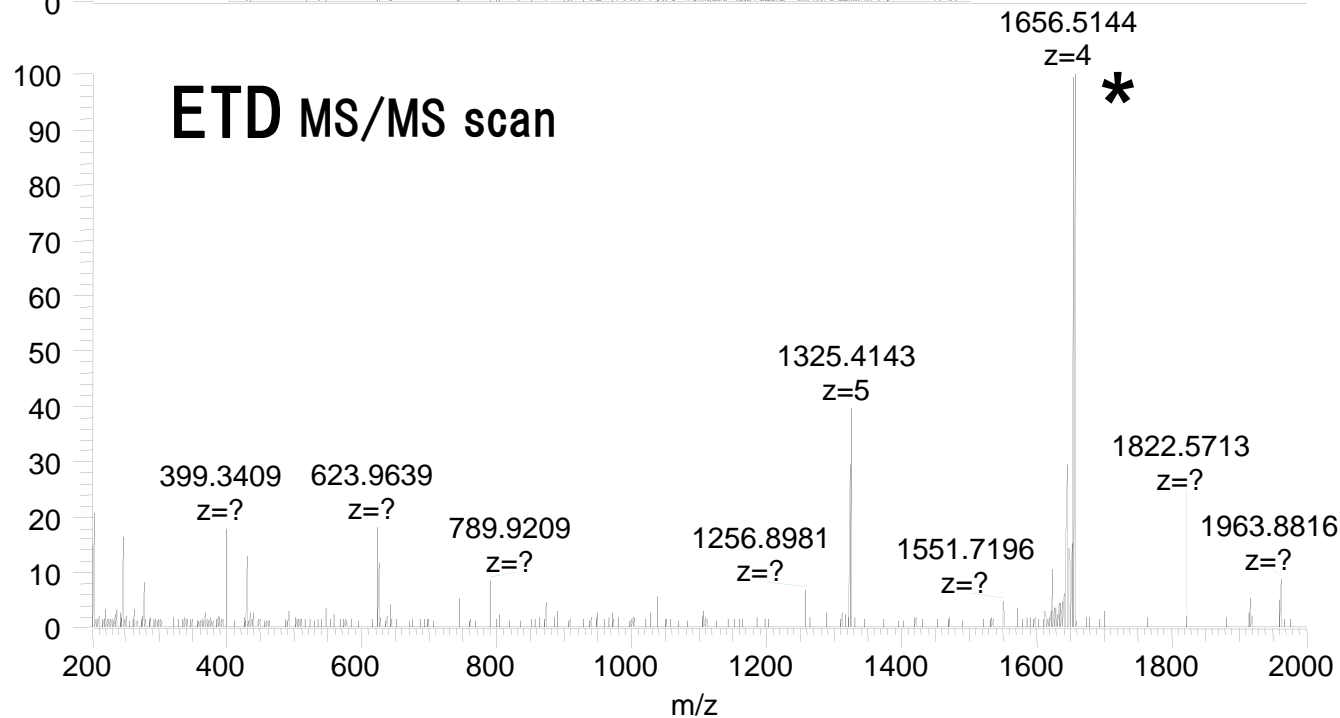

NL: 1.10E5

2000msec\_uS2#1250 RT: 50.57  
AV: 1 T: FTMS + p NSI d sa Full  
ms2 1325.22@etd36.00  
[200.00-2000.00]

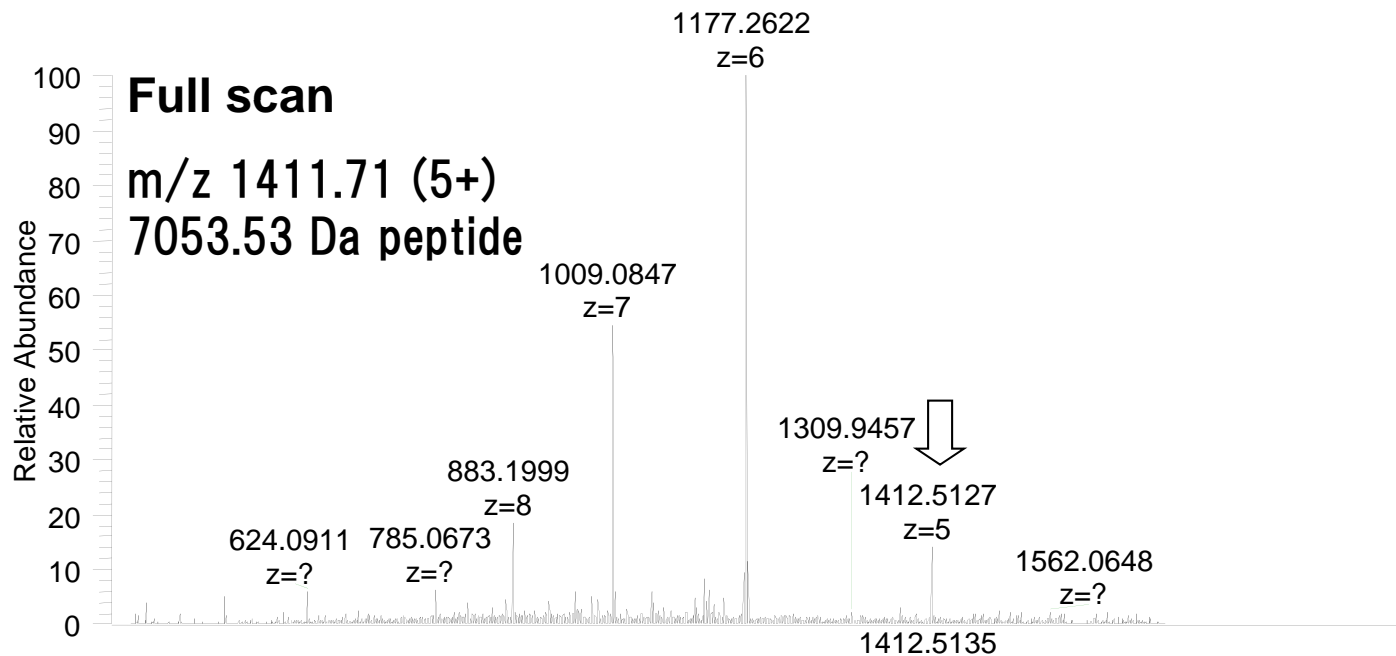

NL: 1.10E7

CID\_test#1953 RT: 44.49 AV:  
 1 T: FTMS + p NSI Full ms  
 [400.00-1700.00]

NL: 3.06E5

CID\_test#1955 RT: 44.52 AV:  
 1 T: FTMS + p NSI d Full ms2  
 1412.51 @cid35.00  
 [375.00-2000.00]

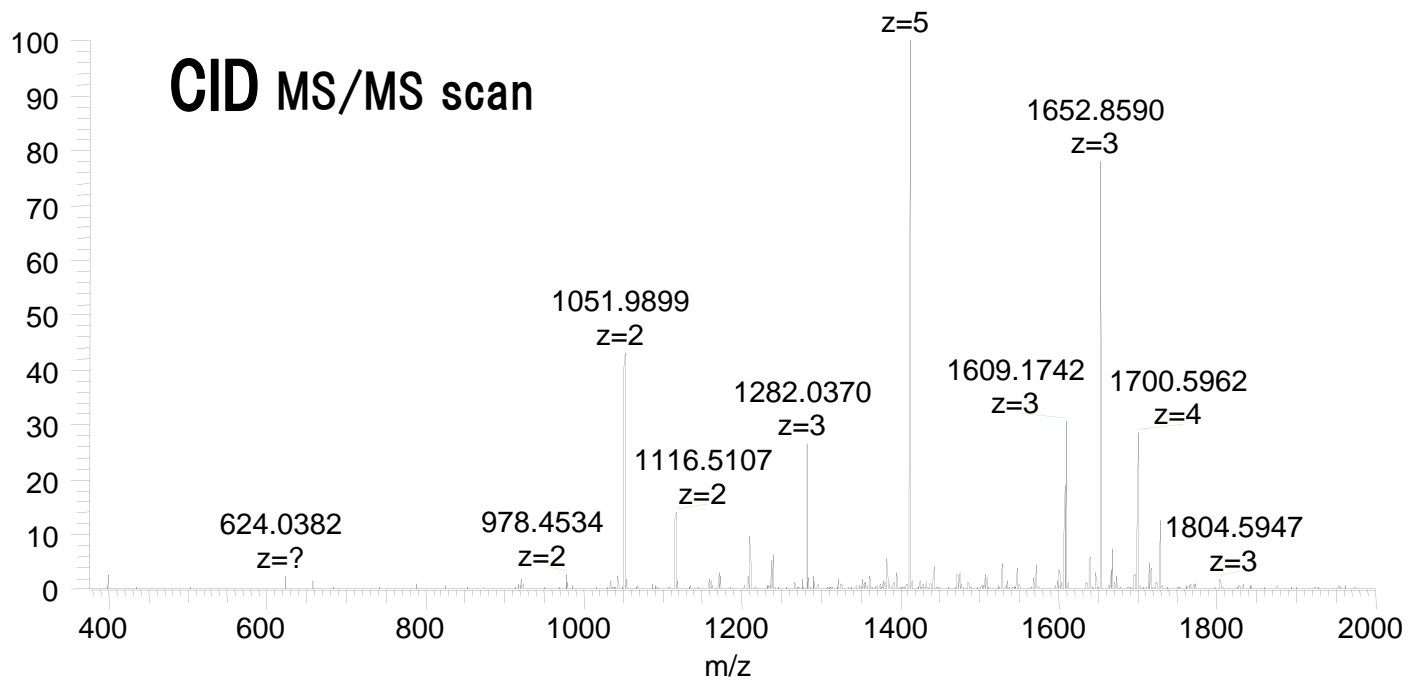

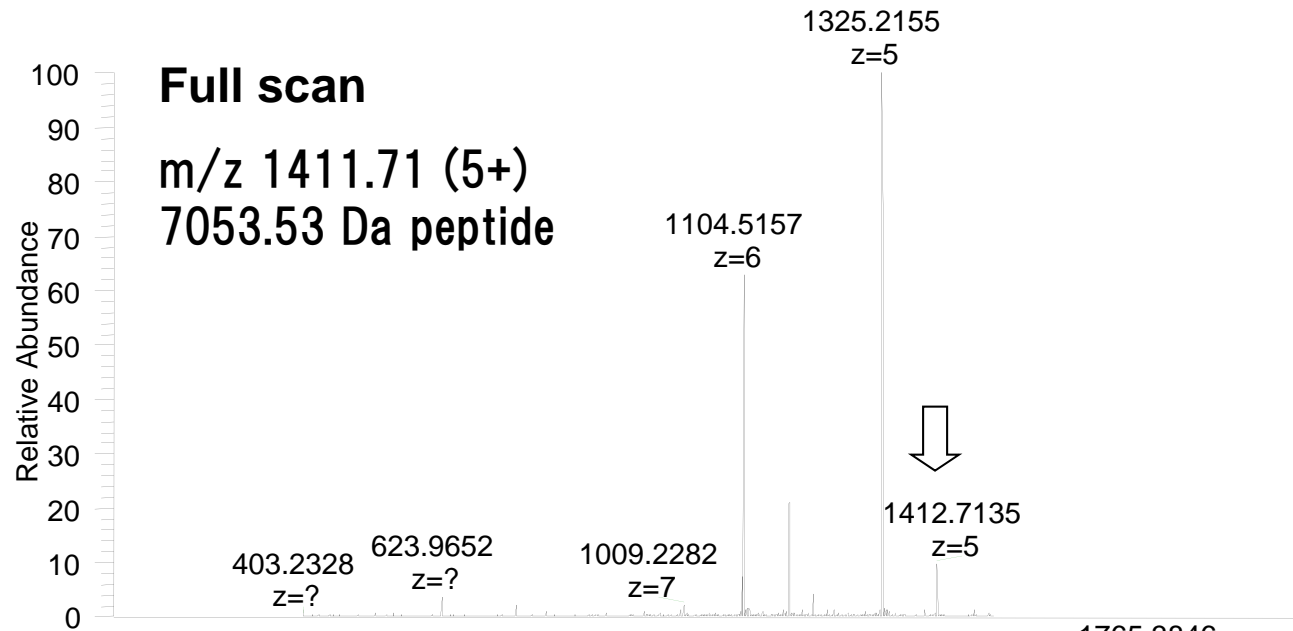

NL: 1.23E7

2000msec\_uS2#1267 RT: 51.25  
AV: 1 T: FTMS + p NSI Full ms  
[403.00-1500.00]

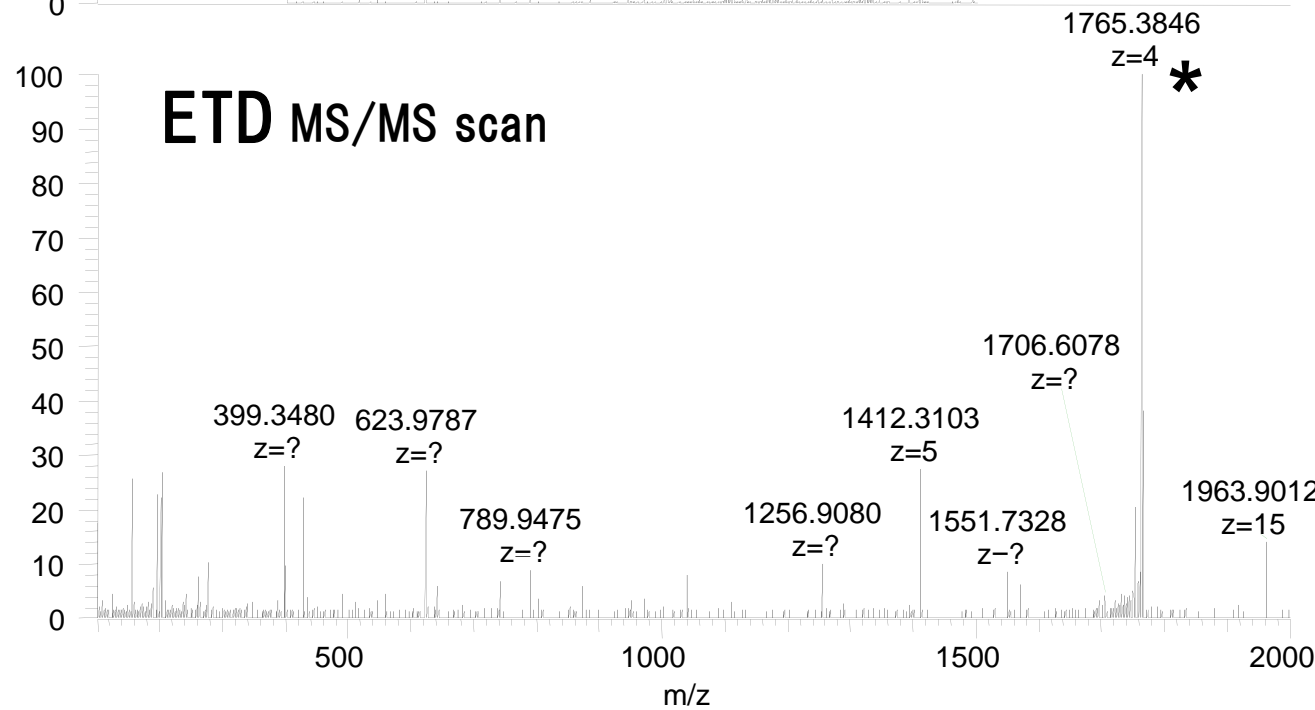

NL: 9.56E3

2000msec\_uS2#1268 RT: 51.29  
AV: 1 T: FTMS + p NSI d sa Full  
ms2 1412.71@etd36.00  
[100.00-2000.00]

# Supplemental Figure S3

## b) Mascot Search Results

### Peptide View

MS/MS Fragmentation of **SQEETPGHRRKEAEGTEEGGEEEDDEEMDPQTIDSLIELSTKLHLPADDVVSIIIEVEE**  
 Found in **gj17136078** in **NCBI nr**, neurosecretory protein VGF precursor [Homo sapiens]

Match to Query 372: 6618.020620 from(1324.611400,5+) intensity(12476334.0000) scans(2002) rtinseconds(2733.7388)

Title: 540: Scan 2002 (rt=2733.74)

Data file tempfile

Click mouse within plot area to zoom in by factor of two about that point

Or,  0 to  Da

Label all possible matches  Label matches used for scoring

Show Y-axis

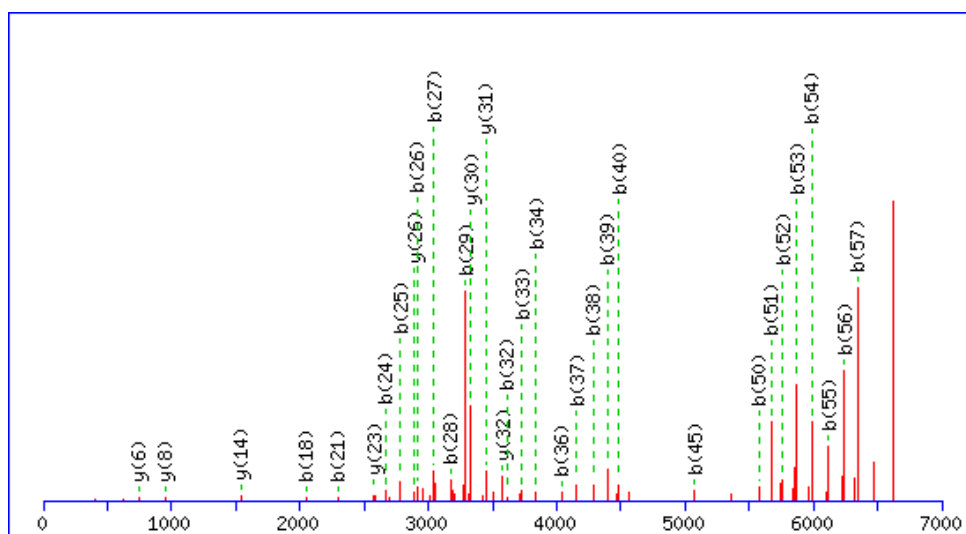

Monoisotopic mass of neutral peptide  $M_r(\text{calc})$ : 6618.0362

Ions Score: 203 Expect: 4.8e-017

Matches : 33/329 fragment ions using 40 most intense peaks ([help](#))

| #  | a         | a*        | b                | b*        | Seq. | y         | y*        | #  |
|----|-----------|-----------|------------------|-----------|------|-----------|-----------|----|
| 1  | 60.0444   |           | 88.0393          |           | S    |           |           | 59 |
| 2  | 188.1030  | 171.0764  | 216.0979         | 199.0713  | Q    | 6532.0115 | 6514.9850 | 58 |
| 3  | 317.1456  | 300.1190  | 345.1405         | 328.1139  | E    | 6403.9530 | 6386.9264 | 57 |
| 4  | 446.1882  | 429.1616  | 474.1831         | 457.1565  | E    | 6274.9104 | 6257.8838 | 56 |
| 5  | 547.2358  | 530.2093  | 575.2307         | 558.2042  | T    | 6145.8678 | 6128.8412 | 55 |
| 6  | 644.2886  | 627.2620  | 672.2835         | 655.2570  | P    | 6044.8201 | 6027.7935 | 54 |
| 7  | 701.3101  | 684.2835  | 729.3050         | 712.2784  | G    | 5947.7673 | 5930.7408 | 53 |
| 8  | 838.3690  | 821.3424  | 866.3639         | 849.3373  | H    | 5890.7459 | 5873.7193 | 52 |
| 9  | 994.4701  | 977.4435  | 1022.4650        | 1005.4384 | R    | 5753.6869 | 5736.6604 | 51 |
| 10 | 1150.5712 | 1133.5446 | 1178.5661        | 1161.5396 | R    | 5597.5858 | 5580.5593 | 50 |
| 11 | 1278.6662 | 1261.6396 | 1306.6611        | 1289.6345 | K    | 5441.4847 | 5424.4582 | 49 |
| 12 | 1407.7088 | 1390.6822 | 1435.7037        | 1418.6771 | E    | 5313.3898 | 5296.3632 | 48 |
| 13 | 1478.7459 | 1461.7193 | 1506.7408        | 1489.7142 | A    | 5184.3472 | 5167.3206 | 47 |
| 14 | 1607.7885 | 1590.7619 | 1635.7834        | 1618.7568 | E    | 5113.3101 | 5096.2835 | 46 |
| 15 | 1664.8099 | 1647.7834 | 1692.8048        | 1675.7783 | G    | 4984.2675 | 4967.2409 | 45 |
| 16 | 1765.8576 | 1748.8311 | 1793.8525        | 1776.8260 | T    | 4927.2460 | 4910.2194 | 44 |
| 17 | 1894.9002 | 1877.8736 | 1922.8951        | 1905.8686 | E    | 4826.1983 | 4809.1718 | 43 |
| 18 | 2023.9428 | 2006.9162 | <b>2051.9377</b> | 2034.9112 | E    | 4697.1557 | 4680.1292 | 42 |
| 19 | 2080.9642 | 2063.9377 | 2108.9592        | 2091.9326 | G    | 4568.1131 | 4551.0866 | 41 |

|    |           |           |           |           |   |           |           |    |
|----|-----------|-----------|-----------|-----------|---|-----------|-----------|----|
| 20 | 2137.9857 | 2120.9592 | 2165.9806 | 2148.9541 | G | 4511.0917 | 4494.0651 | 40 |
| 21 | 2267.0283 | 2250.0018 | 2295.0232 | 2277.9967 | E | 4454.0702 | 4437.0437 | 39 |
| 22 | 2396.0709 | 2379.0444 | 2424.0658 | 2407.0393 | E | 4325.0276 | 4308.0011 | 38 |
| 23 | 2525.1135 | 2508.0869 | 2553.1084 | 2536.0819 | E | 4195.9850 | 4178.9585 | 37 |
| 24 | 2640.1404 | 2623.1139 | 2668.1354 | 2651.1088 | D | 4066.9424 | 4049.9159 | 36 |
| 25 | 2755.1674 | 2738.1408 | 2783.1623 | 2766.1357 | D | 3951.9155 | 3934.8889 | 35 |
| 26 | 2884.2100 | 2867.1834 | 2912.2049 | 2895.1783 | E | 3836.8885 | 3819.8620 | 34 |
| 27 | 3013.2526 | 2996.2260 | 3041.2475 | 3024.2209 | E | 3707.8459 | 3690.8194 | 33 |
| 28 | 3144.2930 | 3127.2665 | 3172.2880 | 3155.2614 | M | 3578.8034 | 3561.7768 | 32 |
| 29 | 3259.3200 | 3242.2934 | 3287.3149 | 3270.2884 | D | 3447.7629 | 3430.7363 | 31 |
| 30 | 3356.3728 | 3339.3462 | 3384.3677 | 3367.3411 | P | 3332.7359 | 3315.7094 | 30 |
| 31 | 3484.4313 | 3467.4048 | 3512.4263 | 3495.3997 | Q | 3235.6832 | 3218.6566 | 29 |
| 32 | 3585.4790 | 3568.4525 | 3613.4739 | 3596.4474 | T | 3107.6246 | 3090.5980 | 28 |
| 33 | 3698.5631 | 3681.5365 | 3726.5580 | 3709.5314 | I | 3006.5769 | 2989.5504 | 27 |
| 34 | 3813.5900 | 3796.5635 | 3841.5849 | 3824.5584 | D | 2893.4928 | 2876.4663 | 26 |
| 35 | 3900.6220 | 3883.5955 | 3928.6170 | 3911.5904 | S | 2778.4659 | 2761.4393 | 25 |
| 36 | 4013.7061 | 3996.6796 | 4041.7010 | 4024.6745 | L | 2691.4339 | 2674.4073 | 24 |
| 37 | 4126.7902 | 4109.7636 | 4154.7851 | 4137.7585 | I | 2578.3498 | 2561.3233 | 23 |
| 38 | 4255.8328 | 4238.8062 | 4283.8277 | 4266.8011 | E | 2465.2657 | 2448.2392 | 22 |
| 39 | 4368.9168 | 4351.8903 | 4396.9117 | 4379.8852 | L | 2336.2231 | 2319.1966 | 21 |
| 40 | 4455.9489 | 4438.9223 | 4483.9438 | 4466.9172 | S | 2223.1391 | 2206.1125 | 20 |
| 41 | 4556.9965 | 4539.9700 | 4584.9915 | 4567.9649 | T | 2136.1071 | 2119.0805 | 19 |
| 42 | 4685.0915 | 4668.0650 | 4713.0864 | 4696.0599 | K | 2035.0594 | 2018.0328 | 18 |
| 43 | 4798.1756 | 4781.1490 | 4826.1705 | 4809.1439 | L | 1906.9644 |           | 17 |
| 44 | 4935.2345 | 4918.2079 | 4963.2294 | 4946.2028 | H | 1793.8804 |           | 16 |
| 45 | 5048.3185 | 5031.2920 | 5076.3135 | 5059.2869 | L | 1656.8214 |           | 15 |
| 46 | 5145.3713 | 5128.3448 | 5173.3662 | 5156.3397 | P | 1543.7374 |           | 14 |
| 47 | 5216.4084 | 5199.3819 | 5244.4033 | 5227.3768 | A | 1446.6846 |           | 13 |
| 48 | 5331.4354 | 5314.4088 | 5359.4303 | 5342.4037 | D | 1375.6475 |           | 12 |
| 49 | 5446.4623 | 5429.4358 | 5474.4572 | 5457.4307 | D | 1260.6206 |           | 11 |
| 50 | 5545.5307 | 5528.5042 | 5573.5256 | 5556.4991 | V | 1145.5936 |           | 10 |
| 51 | 5644.5991 | 5627.5726 | 5672.5941 | 5655.5675 | V | 1046.5252 |           | 9  |
| 52 | 5731.6312 | 5714.6046 | 5759.6261 | 5742.5995 | S | 947.4568  |           | 8  |
| 53 | 5844.7152 | 5827.6887 | 5872.7101 | 5855.6836 | I | 860.4248  |           | 7  |
| 54 | 5957.7993 | 5940.7727 | 5985.7942 | 5968.7677 | I | 747.3407  |           | 6  |
| 55 | 6086.8419 | 6069.8153 | 6114.8368 | 6097.8103 | E | 634.2566  |           | 5  |
| 56 | 6215.8845 | 6198.8579 | 6243.8794 | 6226.8528 | E | 505.2140  |           | 4  |
| 57 | 6314.9529 | 6297.9263 | 6342.9478 | 6325.9213 | V | 376.1714  |           | 3  |
| 58 | 6443.9955 | 6426.9689 | 6471.9904 | 6454.9639 | E | 277.1030  |           | 2  |
| 59 |           |           |           |           | E | 148.0604  |           | 1  |

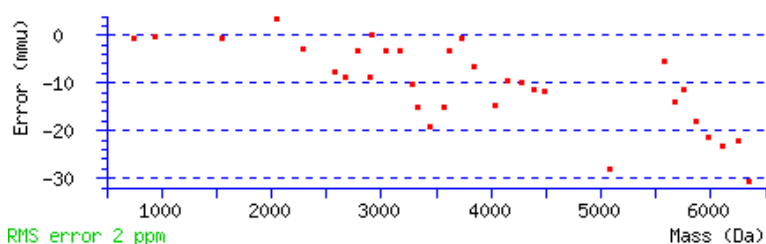

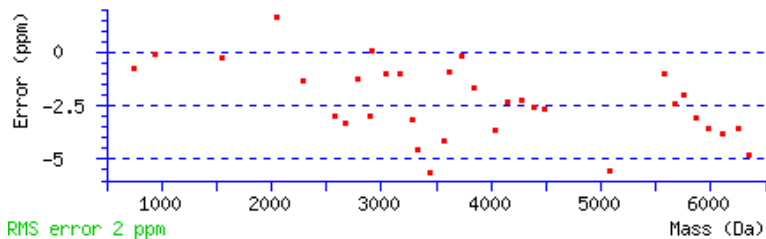

NCBI **BLAST** search of [SQEETPGHRRKEAEGTEEGGEEEDDEEMDPQTIDSLIELSTKLHLPADDVVSIIIEVEE](#)  
 (Parameters: blastp, nr protein database, expect=20000, no filter, PAM30)  
 Other BLAST [web gateways](#)

**All matches to this query**

| Score | Mr(calc)  | Delta   | Sequence                                                                     |
|-------|-----------|---------|------------------------------------------------------------------------------|
| 202.9 | 6618.0362 | -0.0156 | <a href="#">SQEETPGHRRKEAEGTEEGGEEEDDEEMDPQTIDSLIELSTKLHLPADDVVSIIIEVEE</a>  |
| 2.5   | 6617.9977 | 0.0229  | <a href="#">LFKRISQFTAMFRRKAFLHWYTGEGMDEMFEAEASNNDLVSEYQQYQDATAE</a>         |
| 0.9   | 6618.0067 | 0.0140  | <a href="#">EDMEEIRTEMNKRKENCSENILDSMPDIRSALQRDAAAAYAHPEQYEERFLQEET</a>      |
| 0.9   | 6617.9940 | 0.0266  | <a href="#">SDIGTGCLSSLENLRLPTLREESSPRELEDSSGDQGRCPHQGSEDPSMLSQAQSATEVEE</a> |
| 0.7   | 6618.0525 | -0.0319 | <a href="#">FAFPRATLITVMLAFIMYMLRNATQQKDMVENPEPPSGVRCCQMCCGPFLLETPSE</a>     |
| 0.7   | 6618.0525 | -0.0319 | <a href="#">FAFPRATLITVMLAFIMYMLRNATQQKDMVENPEPPSGVRCCQMCCGPFLLETPSE</a>     |
| 0.7   | 6618.0525 | -0.0319 | <a href="#">FAFPRATLITVMLAFIMYMLRNATQQKDMVENPEPPSGVRCCQMCCGPFLLETPSE</a>     |

**Mascot:** <http://www.matrixscience.com/>

# MASCOT SCIENCE Mascot Search Results

## Peptide View

MS/MS Fragmentation of

**APSDPRLRQFLQKSLAAAGKQELAKYFLAELLSEPNQTENDALEPEDLSQAAEQDEMRLLEQ**

Found in **gi|4507243** in **NCBIInr**, somatostatin preproprotein [Homo sapiens]

Match to Query 429: 7053.512120 from(1411.709700,5+) intensity(7144084.0000) scans(1955) rtinseconds(2671.3214)

Title: 505: Scan 1955 (rt=2671.32)

Data file tempfile

Click mouse within plot area to zoom in by factor of two about that point

Or,  0 to  Da

Label all possible matches  Label matches used for scoring

Show Y-axis

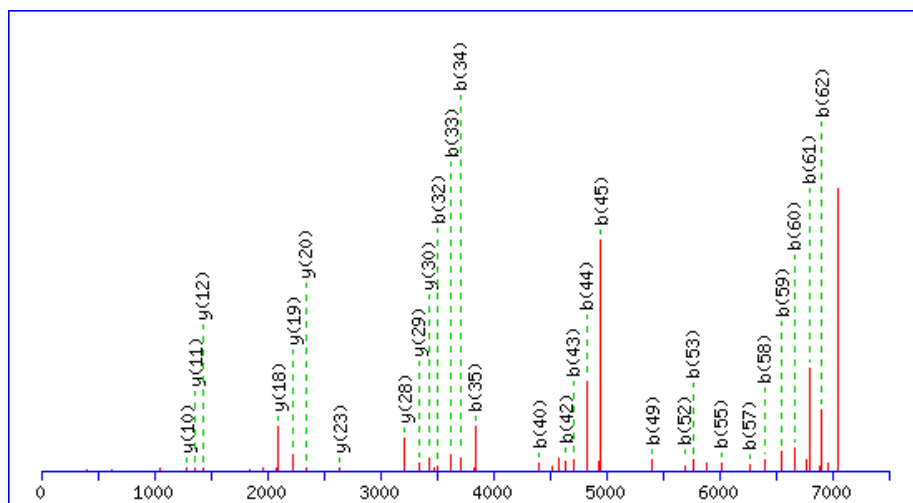

Monoisotopic mass of neutral peptide  $M_r(\text{calc})$ : 7053.5304

Ions Score: 129 Expect: 5.1e-009

Matches : 29/362 fragment ions using 38 most intense peaks ([help](#))

| #  | a         | a*        | b         | b*        | Seq. | y         | y*        | #  |
|----|-----------|-----------|-----------|-----------|------|-----------|-----------|----|
| 1  | 44.0495   |           | 72.0444   |           | A    |           |           | 63 |
| 2  | 141.1022  |           | 169.0972  |           | P    | 6983.5008 | 6966.4742 | 62 |
| 3  | 228.1343  |           | 256.1292  |           | S    | 6886.4480 | 6869.4214 | 61 |
| 4  | 343.1612  |           | 371.1561  |           | D    | 6799.4160 | 6782.3894 | 60 |
| 5  | 440.2140  |           | 468.2089  |           | P    | 6684.3890 | 6667.3625 | 59 |
| 6  | 596.3151  | 579.2885  | 624.3100  | 607.2835  | R    | 6587.3363 | 6570.3097 | 58 |
| 7  | 709.3991  | 692.3726  | 737.3941  | 720.3675  | L    | 6431.2351 | 6414.2086 | 57 |
| 8  | 865.5003  | 848.4737  | 893.4952  | 876.4686  | R    | 6318.1511 | 6301.1245 | 56 |
| 9  | 993.5588  | 976.5323  | 1021.5538 | 1004.5272 | Q    | 6162.0500 | 6145.0234 | 55 |
| 10 | 1140.6273 | 1123.6007 | 1168.6222 | 1151.5956 | F    | 6033.9914 | 6016.9648 | 54 |
| 11 | 1253.7113 | 1236.6848 | 1281.7062 | 1264.6797 | L    | 5886.9230 | 5869.8964 | 53 |
| 12 | 1381.7699 | 1364.7433 | 1409.7648 | 1392.7383 | Q    | 5773.8389 | 5756.8124 | 52 |
| 13 | 1509.8649 | 1492.8383 | 1537.8598 | 1520.8332 | K    | 5645.7803 | 5628.7538 | 51 |
| 14 | 1596.8969 | 1579.8703 | 1624.8918 | 1607.8653 | S    | 5517.6854 | 5500.6588 | 50 |
| 15 | 1709.9809 | 1692.9544 | 1737.9759 | 1720.9493 | L    | 5430.6533 | 5413.6268 | 49 |
| 16 | 1781.0181 | 1763.9915 | 1809.0130 | 1791.9864 | A    | 5317.5693 | 5300.5427 | 48 |
| 17 | 1852.0552 | 1835.0286 | 1880.0501 | 1863.0235 | A    | 5246.5322 | 5229.5056 | 47 |
| 18 | 1923.0923 | 1906.0657 | 1951.0872 | 1934.0607 | A    | 5175.4951 | 5158.4685 | 46 |
| 19 | 1994.1294 | 1977.1029 | 2022.1243 | 2005.0978 | A    | 5104.4579 | 5087.4314 | 45 |
| 20 | 2051.1509 | 2034.1243 | 2079.1458 | 2062.1192 | G    | 5033.4208 | 5016.3943 | 44 |
| 21 | 2179.2458 | 2162.2193 | 2207.2407 | 2190.2142 | K    | 4976.3994 | 4959.3728 | 43 |



|    |           |           |           |           |   |           |           |    |
|----|-----------|-----------|-----------|-----------|---|-----------|-----------|----|
| 22 | 2307.3044 | 2290.2779 | 2335.2993 | 2318.2728 | Q | 4848.3044 | 4831.2778 | 42 |
| 23 | 2436.3470 | 2419.3205 | 2464.3419 | 2447.3154 | E | 4720.2458 | 4703.2193 | 41 |
| 24 | 2549.4311 | 2532.4045 | 2577.4260 | 2560.3994 | L | 4591.2032 | 4574.1767 | 40 |
| 25 | 2620.4682 | 2603.4416 | 2648.4631 | 2631.4365 | A | 4478.1192 | 4461.0926 | 39 |
| 26 | 2748.5631 | 2731.5366 | 2776.5581 | 2759.5315 | K | 4407.0820 | 4390.0555 | 38 |
| 27 | 2911.6265 | 2894.5999 | 2939.6214 | 2922.5948 | Y | 4278.9871 | 4261.9605 | 37 |
| 28 | 3058.6949 | 3041.6683 | 3086.6898 | 3069.6633 | F | 4115.9238 | 4098.8972 | 36 |
| 29 | 3171.7790 | 3154.7524 | 3199.7739 | 3182.7473 | L | 3968.8553 | 3951.8288 | 35 |
| 30 | 3242.8161 | 3225.7895 | 3270.8110 | 3253.7844 | A | 3855.7713 | 3838.7447 | 34 |
| 31 | 3371.8587 | 3354.8321 | 3399.8536 | 3382.8270 | E | 3784.7342 | 3767.7076 | 33 |
| 32 | 3484.9427 | 3467.9162 | 3512.9376 | 3495.9111 | L | 3655.6916 | 3638.6650 | 32 |
| 33 | 3598.0268 | 3581.0002 | 3626.0217 | 3608.9952 | L | 3542.6075 | 3525.5810 | 31 |
| 34 | 3685.0588 | 3668.0323 | 3713.0537 | 3696.0272 | S | 3429.5234 | 3412.4969 | 30 |
| 35 | 3814.1014 | 3797.0749 | 3842.0963 | 3825.0698 | E | 3342.4914 | 3325.4649 | 29 |
| 36 | 3911.1542 | 3894.1276 | 3939.1491 | 3922.1225 | P | 3213.4488 | 3196.4223 | 28 |
| 37 | 4025.1971 | 4008.1705 | 4053.1920 | 4036.1655 | N | 3116.3961 | 3099.3695 | 27 |
| 38 | 4153.2557 | 4136.2291 | 4181.2506 | 4164.2240 | Q | 3002.3531 | 2985.3266 | 26 |
| 39 | 4254.3034 | 4237.2768 | 4282.2983 | 4265.2717 | T | 2874.2946 | 2857.2680 | 25 |
| 40 | 4383.3459 | 4366.3194 | 4411.3409 | 4394.3143 | E | 2773.2469 | 2756.2203 | 24 |
| 41 | 4497.3889 | 4480.3623 | 4525.3838 | 4508.3572 | N | 2644.2043 | 2627.1777 | 23 |
| 42 | 4612.4158 | 4595.3893 | 4640.4107 | 4623.3842 | D | 2530.1614 | 2513.1348 | 22 |
| 43 | 4683.4529 | 4666.4264 | 4711.4478 | 4694.4213 | A | 2415.1344 | 2398.1079 | 21 |
| 44 | 4796.5370 | 4779.5104 | 4824.5319 | 4807.5054 | L | 2344.0973 | 2327.0707 | 20 |
| 45 | 4925.5796 | 4908.5530 | 4953.5745 | 4936.5480 | E | 2231.0132 | 2213.9867 | 19 |
| 46 | 5022.6324 | 5005.6058 | 5050.6273 | 5033.6007 | P | 2101.9706 | 2084.9441 | 18 |
| 47 | 5151.6749 | 5134.6484 | 5179.6699 | 5162.6433 | E | 2004.9179 | 1987.8913 | 17 |
| 48 | 5266.7019 | 5249.6753 | 5294.6968 | 5277.6703 | D | 1875.8753 | 1858.8487 | 16 |
| 49 | 5379.7860 | 5362.7594 | 5407.7809 | 5390.7543 | L | 1760.8483 | 1743.8218 | 15 |
| 50 | 5466.8180 | 5449.7914 | 5494.8129 | 5477.7863 | S | 1647.7643 | 1630.7377 | 14 |
| 51 | 5594.8766 | 5577.8500 | 5622.8715 | 5605.8449 | Q | 1560.7322 | 1543.7057 | 13 |
| 52 | 5665.9137 | 5648.8871 | 5693.9086 | 5676.8820 | A | 1432.6737 | 1415.6471 | 12 |
| 53 | 5736.9508 | 5719.9242 | 5764.9457 | 5747.9192 | A | 1361.6366 | 1344.6100 | 11 |
| 54 | 5865.9934 | 5848.9668 | 5893.9883 | 5876.9617 | E | 1290.5994 | 1273.5729 | 10 |
| 55 | 5994.0520 | 5977.0254 | 6022.0469 | 6005.0203 | Q | 1161.5569 | 1144.5303 | 9  |
| 56 | 6109.0789 | 6092.0524 | 6137.0738 | 6120.0473 | D | 1033.4983 | 1016.4717 | 8  |
| 57 | 6238.1215 | 6221.0949 | 6266.1164 | 6249.0899 | E | 918.4713  | 901.4448  | 7  |
| 58 | 6369.1620 | 6352.1354 | 6397.1569 | 6380.1303 | M | 789.4287  | 772.4022  | 6  |
| 59 | 6525.2631 | 6508.2365 | 6553.2580 | 6536.2315 | R | 658.3883  | 641.3617  | 5  |
| 60 | 6638.3472 | 6621.3206 | 6666.3421 | 6649.3155 | L | 502.2871  | 485.2606  | 4  |
| 61 | 6767.3897 | 6750.3632 | 6795.3847 | 6778.3581 | E | 389.2031  | 372.1765  | 3  |
| 62 | 6880.4738 | 6863.4473 | 6908.4687 | 6891.4422 | L | 260.1605  | 243.1339  | 2  |
| 63 |           |           |           |           | Q | 147.0764  | 130.0499  | 1  |

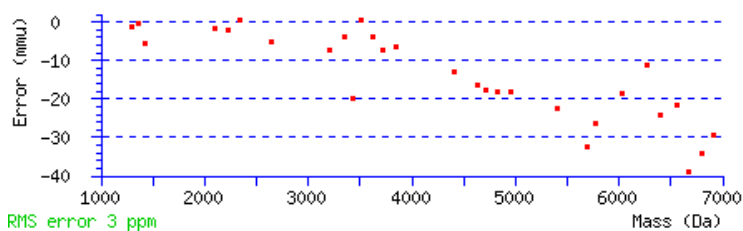

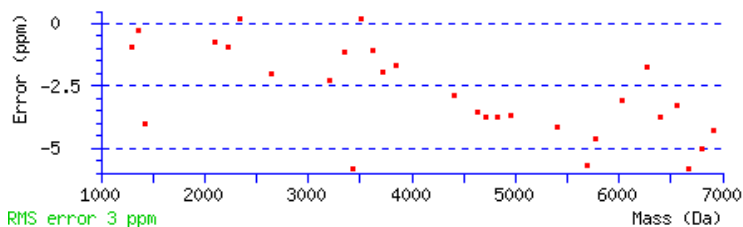

NCBI BLAST search of [APSDPRLRQFLQKSLAAAAGKQELAKYFLAELLSEPNQTENDALEPEDLSQAAEQDEMRLLEQ](#)  
 (Parameters: blastp, nr protein database, expect=20000, no filter, PAM30)

Other BLAST [web gateways](#)

**All matches to this query**

| Score | Mr(calc)  | Delta   | Sequence                                                                             |
|-------|-----------|---------|--------------------------------------------------------------------------------------|
| 129.4 | 7053.5304 | -0.0183 | <a href="#">APSDPRLRQFLQKSLAAAAGKQELAKYFLAELLSEPNQTENDALEPEDLSQAAEQDEMRLLEQ</a>      |
| 6.7   | 7053.5147 | -0.0026 | <a href="#">IGLCACICRSLYPTIATGILHLLAGLCTLGSVSCYVAGIELLHQKLELPDENVSGEFWSFCLACVS</a>   |
| 6.7   | 7053.5147 | -0.0026 | <a href="#">IGLCACICRSLYPTIATGILHLLAGLCTLGSVSCYVAGIELLHQKLELPDENVSGEFGWSFCLACVSA</a> |
| 5.3   | 7053.5433 | -0.0312 | <a href="#">QRSGEESYNLDSVAKNGLGLELGPQPQGVLRADIFSRMRTLVA TVLDFIELFNQGTAFPAFEME</a>    |
| 5.1   | 7053.5309 | -0.0188 | <a href="#">HPETIVLDTLPAIRTLDRSKSYELIRKIEAYMEDDRICSPFMELTS LCGDDTMRLEK</a>           |
| 4.0   | 7053.5451 | -0.0330 | <a href="#">NFVVDQMCEIGKPEPLNEEEARGVVENYNDEEV SIRVGGNTQPSKVLNKKNVEAIGLLGGQSK</a>     |
| 3.9   | 7053.5083 | 0.0038  | <a href="#">MEEIEGSVTVRDYIQSTMETEKTPQGLSNLAKTIGQVLARMHDEDLIHGDLTTSNMLLKPPLE</a>      |
| 3.8   | 7053.5129 | -0.0008 | <a href="#">TLSSPAESCRSKVRGTSKPIFSLFADNVDLKELGRKEKEMQMELREKMSEYQMEKLASDNK</a>        |
| 3.8   | 7053.5129 | -0.0008 | <a href="#">TLSSPAESCRSKVRGTSKPIFSLFADNVDLKELGRKEKEMQMELREKMSEYQMEKLASDNK</a>        |
| 3.7   | 7053.4975 | 0.0146  | <a href="#">PFMLFDPSNPLLASQLLSGAIPQIPASSATSPSTPTSTMNTLKRKLEEKASASPGENDSGTGGEEPQR</a> |

Mascot: <http://www.matrixscience.com/>
